# Supplementary material for: Exogenous Calcium Alleviates Oxidative Stress Caused by Salt Stress in Peanut Seedling Roots by Regulating the Antioxidant Enzyme System and Flavonoid Biosynthesis
Source: Antioxidants (Basel). 2024 Feb 14;13(2):233. doi: 10.3390/antiox13020233 (PMC10886236; doi:10.3390/antiox13020233)
Supplement: Supplementary file 1 [file antioxidants-13-00233-s001.zip]

Archive with 9 entries (9 files):
- Figure S1.pdf
- Figure S2.jpg
- Figure S3.pdf
- Figure S4.pdf
- Table S1.xlsx
- Table S2.xlsx
- Table S3.xlsx
- Table S4.xlsx
- Table S5.xlsx
