# Supplementary material for: Exogenous Calcium Alleviates Oxidative Stress Caused by Salt Stress in Peanut Seedling Roots by Regulating the Antioxidant Enzyme System and Flavonoid Biosynthesis
Source: Antioxidants (Basel). 2024 Feb 14;13(2):233. doi: 10.3390/antiox13020233 (PMC10886236; doi:10.3390/antiox13020233)
Supplement: Supplementary file 1 [file antioxidants-13-00233-s001.zip › Table S1.xlsx]

## Sheet: Sheet1
ID	Ontology	Description			ID	Ontology	Description
GO:0009505	Cellular component	plant-type cell wall		1	GO:0009505	Cellular component	plant-type cell wall
GO:0031225	Cellular component	anchored component of membrane		2	GO:0031225	Cellular component	anchored component of membrane
GO:0005871	Cellular component	kinesin complex		3	GO:0005871	Cellular component	kinesin complex
GO:0005875	Cellular component	microtubule associated complex		4	GO:0005875	Cellular component	microtubule associated complex
GO:0046658	Cellular component	anchored component of plasma membrane		5	GO:0046658	Cellular component	anchored component of plasma membrane
GO:0055028	Cellular component	cortical microtubule		6	GO:0055028	Cellular component	cortical microtubule
GO:0005887	Cellular component	integral component of plasma membrane		7	GO:0005887	Cellular component	integral component of plasma membrane
GO:0005881	Cellular component	cytoplasmic microtubule		8	GO:0005881	Cellular component	cytoplasmic microtubule
GO:0030981	Cellular component	cortical microtubule cytoskeleton		9	GO:0030981	Cellular component	cortical microtubule cytoskeleton
GO:0030863	Cellular component	cortical cytoskeleton		10	GO:0030863	Cellular component	cortical cytoskeleton
GO:0042807	Cellular component	central vacuole		11	GO:0009698	Biological process	phenylpropanoid metabolic process
GO:0009524	Cellular component	phragmoplast		12	GO:0042546	Biological process	cell wall biogenesis
GO:0009531	Cellular component	secondary cell wall		13	GO:0072593	Biological process	reactive oxygen species metabolic process
GO:0010330	Cellular component	cellulose synthase complex		14	GO:0007017	Biological process	microtubule-based process
GO:0031463	Cellular component	Cul3-RING ubiquitin ligase complex		15	GO:0017001	Biological process	antibiotic catabolic process
GO:0044421	Cellular component	extracellular region part		16	GO:0007018	Biological process	microtubule-based movement
GO:0000786	Cellular component	nucleosome		17	GO:0042743	Biological process	hydrogen peroxide metabolic process
GO:0048226	Cellular component	Casparian strip		18	GO:0009699	Biological process	phenylpropanoid biosynthetic process
GO:0044815	Cellular component	DNA packaging complex		19	GO:0016999	Biological process	antibiotic metabolic process
GO:0005938	Cellular component	cell cortex		20	GO:0009834	Biological process	plant-type secondary cell wall biogenesis
GO:0005615	Cellular component	extracellular space		21	GO:0008017	Molecular function	microtubule binding
GO:0016363	Cellular component	nuclear matrix		22	GO:0015631	Molecular function	tubulin binding
GO:0099568	Cellular component	cytoplasmic region		23	GO:0035251	Molecular function	UDP-glucosyltransferase activity
GO:0009513	Cellular component	etioplast		24	GO:0003777	Molecular function	microtubule motor activity
GO:0009574	Cellular component	preprophase band		25	GO:0080044	Molecular function	quercetin 7-O-glucosyltransferase activity
GO:0005819	Cellular component	spindle		26	GO:0080043	Molecular function	quercetin 3-O-glucosyltransferase activity
GO:0016328	Cellular component	lateral plasma membrane		27	GO:0004857	Molecular function	enzyme inhibitor activity
GO:0032993	Cellular component	protein-DNA complex		28	GO:0052689	Molecular function	carboxylic ester hydrolase activity
GO:0044448	Cellular component	cell cortex part		29	GO:0045735	Molecular function	nutrient reservoir activity
GO:0000325	Cellular component	plant-type vacuole		30	GO:0003774	Molecular function	motor activity
GO:0031012	Cellular component	extracellular matrix
GO:0044462	Cellular component	external encapsulating structure part
GO:0009331	Cellular component	glycerol-3-phosphate dehydrogenase complex
GO:0042555	Cellular component	MCM complex
GO:0010005	Cellular component	cortical microtubule, transverse to long axis
GO:0044426	Cellular component	cell wall part
GO:0000788	Cellular component	nuclear nucleosome
GO:0009538	Cellular component	photosystem I reaction center
GO:0009504	Cellular component	cell plate
GO:0000323	Cellular component	lytic vacuole
GO:0005884	Cellular component	actin filament
GO:0009705	Cellular component	plant-type vacuole membrane
GO:0009898	Cellular component	cytoplasmic side of plasma membrane
GO:0005828	Cellular component	kinetochore microtubule
GO:0005775	Cellular component	vacuolar lumen
GO:0000407	Cellular component	phagophore assembly site
GO:0010369	Cellular component	chromocenter
GO:0005764	Cellular component	lysosome
GO:0000922	Cellular component	spindle pole
GO:0000795	Cellular component	synaptonemal complex
GO:0099086	Cellular component	synaptonemal structure
GO:0009543	Cellular component	chloroplast thylakoid lumen
GO:0031978	Cellular component	plastid thylakoid lumen
GO:0000808	Cellular component	origin recognition complex
GO:0005788	Cellular component	endoplasmic reticulum lumen
GO:0098552	Cellular component	side of membrane
GO:0009509	Cellular component	chromoplast
GO:0009897	Cellular component	external side of plasma membrane
GO:0009510	Cellular component	plasmodesmatal desmotubule
GO:0009511	Cellular component	plasmodesmatal endoplasmic reticulum
GO:0042575	Cellular component	DNA polymerase complex
GO:0045239	Cellular component	tricarboxylic acid cycle enzyme complex
GO:0000307	Cellular component	cyclin-dependent protein kinase holoenzyme complex
GO:0009317	Cellular component	acetyl-CoA carboxylase complex
GO:0098562	Cellular component	cytoplasmic side of membrane
GO:0001405	Cellular component	PAM complex, Tim23 associated import motor
GO:0031209	Cellular component	SCAR complex
GO:0030915	Cellular component	Smc5-Smc6 complex
GO:0046861	Cellular component	glyoxysomal membrane
GO:0106068	Cellular component	SUMO ligase complex
GO:0005876	Cellular component	spindle microtubule
GO:0016442	Cellular component	RISC complex
GO:0031332	Cellular component	RNAi effector complex
GO:0034045	Cellular component	phagophore assembly site membrane
GO:0043076	Cellular component	megasporocyte nucleus
GO:0043078	Cellular component	polar nucleus
GO:0030126	Cellular component	COPI vesicle coat
GO:0043073	Cellular component	germ cell nucleus
GO:0034399	Cellular component	nuclear periphery
GO:0000421	Cellular component	autophagosome membrane
GO:0005663	Cellular component	DNA replication factor C complex
GO:0000779	Cellular component	condensed chromosome, centromeric region
GO:0005765	Cellular component	lysosomal membrane
GO:0098852	Cellular component	lytic vacuole membrane
GO:0032541	Cellular component	cortical endoplasmic reticulum
GO:0055037	Cellular component	recycling endosome
GO:0000148	Cellular component	1,3-beta-D-glucan synthase complex
GO:0031305	Cellular component	integral component of mitochondrial inner membrane
GO:0000794	Cellular component	condensed nuclear chromosome
GO:0033588	Cellular component	Elongator holoenzyme complex
GO:0030286	Cellular component	dynein complex
GO:0019005	Cellular component	SCF ubiquitin ligase complex
GO:0000793	Cellular component	condensed chromosome
GO:0030137	Cellular component	COPI-coated vesicle
GO:0030663	Cellular component	COPI-coated vesicle membrane
GO:0005930	Cellular component	axoneme
GO:0032838	Cellular component	plasma membrane bounded cell projection cytoplasm
GO:0044441	Cellular component	ciliary part
GO:0097014	Cellular component	ciliary plasm
GO:0009514	Cellular component	glyoxysome
GO:0031304	Cellular component	intrinsic component of mitochondrial inner membrane
GO:0000780	Cellular component	condensed nuclear chromosome, centromeric region
GO:0000347	Cellular component	THO complex
GO:0005815	Cellular component	microtubule organizing center
GO:0005719	Cellular component	nuclear euchromatin
GO:0031977	Cellular component	thylakoid lumen
GO:0009522	Cellular component	photosystem I
GO:0000813	Cellular component	ESCRT I complex
GO:0000785	Cellular component	chromatin
GO:0010319	Cellular component	stromule
GO:0016602	Cellular component	CCAAT-binding factor complex
GO:0009986	Cellular component	cell surface
GO:0000015	Cellular component	phosphopyruvate hydratase complex
GO:0043564	Cellular component	Ku70:Ku80 complex
GO:0000322	Cellular component	storage vacuole
GO:0000326	Cellular component	protein storage vacuole
GO:0005744	Cellular component	TIM23 mitochondrial import inner membrane translocase complex
GO:0005669	Cellular component	transcription factor TFIID complex
GO:0090575	Cellular component	RNA polymerase II transcription factor complex
GO:0000439	Cellular component	transcription factor TFIIH core complex
GO:0033597	Cellular component	mitotic checkpoint complex
GO:0000777	Cellular component	condensed chromosome kinetochore
GO:0000782	Cellular component	telomere cap complex
GO:0000783	Cellular component	nuclear telomere cap complex
GO:0000775	Cellular component	chromosome, centromeric region
GO:0010445	Cellular component	nuclear dicing body
GO:0071782	Cellular component	endoplasmic reticulum tubular network
GO:0000791	Cellular component	euchromatin
GO:0000776	Cellular component	kinetochore
GO:0031514	Cellular component	motile cilium
GO:0030173	Cellular component	integral component of Golgi membrane
GO:0031228	Cellular component	intrinsic component of Golgi membrane
GO:0000923	Cellular component	equatorial microtubule organizing center
GO:0005664	Cellular component	nuclear origin of replication recognition complex
GO:0009533	Cellular component	chloroplast stromal thylakoid
GO:0032155	Cellular component	cell division site part
GO:0070461	Cellular component	SAGA-type complex
GO:0046930	Cellular component	pore complex
GO:0000778	Cellular component	condensed nuclear chromosome kinetochore
GO:0031901	Cellular component	early endosome membrane
GO:0010282	Cellular component	senescence-associated vacuole
GO:0030008	Cellular component	TRAPP complex
GO:0005667	Cellular component	transcription factor complex
GO:0005847	Cellular component	mRNA cleavage and polyadenylation specificity factor complex
GO:0030131	Cellular component	clathrin adaptor complex
GO:0005776	Cellular component	autophagosome
GO:0045335	Cellular component	phagocytic vesicle
GO:0005929	Cellular component	cilium
GO:0030894	Cellular component	replisome
GO:0043601	Cellular component	nuclear replisome
GO:0072686	Cellular component	mitotic spindle
GO:0005655	Cellular component	nucleolar ribonuclease P complex
GO:0030677	Cellular component	ribonuclease P complex
GO:0030681	Cellular component	multimeric ribonuclease P complex
GO:0009706	Cellular component	chloroplast inner membrane
GO:0030120	Cellular component	vesicle coat
GO:0033180	Cellular component	proton-transporting V-type ATPase, V1 domain
GO:1990726	Cellular component	Lsm1-7-Pat1 complex
GO:1902554	Cellular component	serine/threonine protein kinase complex
GO:1902911	Cellular component	protein kinase complex
GO:1902555	Cellular component	endoribonuclease complex
GO:1905348	Cellular component	endonuclease complex
GO:0031201	Cellular component	SNARE complex
GO:0000930	Cellular component	gamma-tubulin complex
GO:0030125	Cellular component	clathrin vesicle coat
GO:0030130	Cellular component	clathrin coat of trans-Golgi network vesicle
GO:0030132	Cellular component	clathrin coat of coated pit
GO:0070652	Cellular component	HAUS complex
GO:0044798	Cellular component	nuclear transcription factor complex
GO:0005777	Cellular component	peroxisome
GO:0042579	Cellular component	microbody
GO:0005779	Cellular component	integral component of peroxisomal membrane
GO:0031231	Cellular component	intrinsic component of peroxisomal membrane
GO:0009528	Cellular component	plastid inner membrane
GO:0005689	Cellular component	U12-type spliceosomal complex
GO:0005657	Cellular component	replication fork
GO:0031965	Cellular component	nuclear membrane
GO:0030118	Cellular component	clathrin coat
GO:0032153	Cellular component	cell division site
GO:0015030	Cellular component	Cajal body
GO:0030427	Cellular component	site of polarized growth
GO:0030687	Cellular component	preribosome, large subunit precursor
GO:0035838	Cellular component	growing cell tip
GO:0051286	Cellular component	cell tip
GO:0090404	Cellular component	pollen tube tip
GO:0042644	Cellular component	chloroplast nucleoid
GO:0044463	Cellular component	cell projection part
GO:0120038	Cellular component	plasma membrane bounded cell projection part
GO:0009521	Cellular component	photosystem
GO:0005680	Cellular component	anaphase-promoting complex
GO:0071556	Cellular component	integral component of lumenal side of endoplasmic reticulum membrane
GO:0098553	Cellular component	lumenal side of endoplasmic reticulum membrane
GO:0000784	Cellular component	nuclear chromosome, telomeric region
GO:0036452	Cellular component	ESCRT complex
GO:0000790	Cellular component	nuclear chromatin
GO:0005688	Cellular component	U6 snRNP
GO:0019774	Cellular component	proteasome core complex, beta-subunit complex
GO:0034702	Cellular component	ion channel complex
GO:0034707	Cellular component	chloride channel complex
GO:0071004	Cellular component	U2-type prespliceosome
GO:0030176	Cellular component	integral component of endoplasmic reticulum membrane
GO:0031227	Cellular component	intrinsic component of endoplasmic reticulum membrane
GO:0031461	Cellular component	cullin-RING ubiquitin ligase complex
GO:0005801	Cellular component	cis-Golgi network
GO:0017119	Cellular component	Golgi transport complex
GO:0031354	Cellular component	intrinsic component of plastid outer membrane
GO:0031355	Cellular component	integral component of plastid outer membrane
GO:0031358	Cellular component	intrinsic component of chloroplast outer membrane
GO:0031359	Cellular component	integral component of chloroplast outer membrane
GO:0035267	Cellular component	NuA4 histone acetyltransferase complex
GO:0048471	Cellular component	perinuclear region of cytoplasm
GO:0000145	Cellular component	exocyst
GO:0000815	Cellular component	ESCRT III complex
GO:0012511	Cellular component	monolayer-surrounded lipid storage body
GO:1902495	Cellular component	transmembrane transporter complex
GO:0031234	Cellular component	extrinsic component of cytoplasmic side of plasma membrane
GO:0000159	Cellular component	protein phosphatase type 2A complex
GO:0043189	Cellular component	H4/H2A histone acetyltransferase complex
GO:1902562	Cellular component	H4 histone acetyltransferase complex
GO:0015629	Cellular component	actin cytoskeleton
GO:0098797	Cellular component	plasma membrane protein complex
GO:0005849	Cellular component	mRNA cleavage factor complex
GO:0005758	Cellular component	mitochondrial intermembrane space
GO:0044454	Cellular component	nuclear chromosome part
GO:0005682	Cellular component	U5 snRNP
GO:0031350	Cellular component	intrinsic component of plastid membrane
GO:0031351	Cellular component	integral component of plastid membrane
GO:0043596	Cellular component	nuclear replication fork
GO:0071010	Cellular component	prespliceosome
GO:0000123	Cellular component	histone acetyltransferase complex
GO:0090406	Cellular component	pollen tube
GO:0098590	Cellular component	plasma membrane region
GO:0005720	Cellular component	nuclear heterochromatin
GO:0044438	Cellular component	microbody part
GO:0044439	Cellular component	peroxisomal part
GO:0000228	Cellular component	nuclear chromosome
GO:0030119	Cellular component	AP-type membrane coat adaptor complex
GO:0098687	Cellular component	chromosomal region
GO:0032592	Cellular component	integral component of mitochondrial membrane
GO:0008352	Cellular component	katanin complex
GO:0005778	Cellular component	peroxisomal membrane
GO:0031903	Cellular component	microbody membrane
GO:0031011	Cellular component	Ino80 complex
GO:0031595	Cellular component	nuclear proteasome complex
GO:0033202	Cellular component	DNA helicase complex
GO:0030665	Cellular component	clathrin-coated vesicle membrane
GO:0044450	Cellular component	microtubule organizing center part
GO:0009523	Cellular component	photosystem II
GO:0030117	Cellular component	membrane coat
GO:0048475	Cellular component	coated membrane
GO:0031970	Cellular component	organelle envelope lumen
GO:0005834	Cellular component	heterotrimeric G-protein complex
GO:0031597	Cellular component	cytosolic proteasome complex
GO:0043680	Cellular component	filiform apparatus
GO:1905360	Cellular component	GTPase complex
GO:0098573	Cellular component	intrinsic component of mitochondrial membrane
GO:0005666	Cellular component	RNA polymerase III complex
GO:0009654	Cellular component	photosystem II oxygen evolving complex
GO:0071458	Cellular component	integral component of cytoplasmic side of endoplasmic reticulum membrane
GO:0098554	Cellular component	cytoplasmic side of endoplasmic reticulum membrane
GO:0010287	Cellular component	plastoglobule
GO:0032580	Cellular component	Golgi cisterna membrane
GO:0019897	Cellular component	extrinsic component of plasma membrane
GO:0000792	Cellular component	heterochromatin
GO:0000781	Cellular component	chromosome, telomeric region
GO:0005905	Cellular component	clathrin-coated pit
GO:0005793	Cellular component	endoplasmic reticulum-Golgi intermediate compartment
GO:0008287	Cellular component	protein serine/threonine phosphatase complex
GO:0097346	Cellular component	INO80-type complex
GO:1903293	Cellular component	phosphatase complex
GO:0010494	Cellular component	cytoplasmic stress granule
GO:0030139	Cellular component	endocytic vesicle
GO:0120025	Cellular component	plasma membrane bounded cell projection
GO:0042646	Cellular component	plastid nucleoid
GO:0012510	Cellular component	trans-Golgi network transport vesicle membrane
GO:1990351	Cellular component	transporter complex
GO:0009295	Cellular component	nucleoid
GO:0031301	Cellular component	integral component of organelle membrane
GO:0005684	Cellular component	U2-type spliceosomal complex
GO:0005811	Cellular component	lipid droplet
GO:0097526	Cellular component	spliceosomal tri-snRNP complex
GO:0005736	Cellular component	RNA polymerase I complex
GO:0042995	Cellular component	cell projection
GO:0000151	Cellular component	ubiquitin ligase complex
GO:0031300	Cellular component	intrinsic component of organelle membrane
GO:0016324	Cellular component	apical plasma membrane
GO:0031248	Cellular component	protein acetyltransferase complex
GO:1902493	Cellular component	acetyltransferase complex
GO:0031902	Cellular component	late endosome membrane
GO:0016459	Cellular component	myosin complex
GO:0099023	Cellular component	tethering complex
GO:0000152	Cellular component	nuclear ubiquitin ligase complex
GO:0030140	Cellular component	trans-Golgi network transport vesicle
GO:0008023	Cellular component	transcription elongation factor complex
GO:0000418	Cellular component	RNA polymerase IV complex
GO:0033178	Cellular component	proton-transporting two-sector ATPase complex, catalytic domain
GO:0048188	Cellular component	Set1C/COMPASS complex
GO:0005795	Cellular component	Golgi stack
GO:0046540	Cellular component	U4/U6 x U5 tri-snRNP complex
GO:0005665	Cellular component	RNA polymerase II, core complex
GO:0045177	Cellular component	apical part of cell
GO:0033176	Cellular component	proton-transporting V-type ATPase complex
GO:0009707	Cellular component	chloroplast outer membrane
GO:0009527	Cellular component	plastid outer membrane
GO:0030662	Cellular component	coated vesicle membrane
GO:0031985	Cellular component	Golgi cisterna
GO:0005839	Cellular component	proteasome core complex
GO:0030136	Cellular component	clathrin-coated vesicle
GO:0019898	Cellular component	extrinsic component of membrane
GO:0009501	Cellular component	amyloplast
GO:0035097	Cellular component	histone methyltransferase complex
GO:0070603	Cellular component	SWI/SNF superfamily-type complex
GO:0012506	Cellular component	vesicle membrane
GO:1990204	Cellular component	oxidoreductase complex
GO:0030660	Cellular component	Golgi-associated vesicle membrane
GO:0043230	Cellular component	extracellular organelle
GO:0070062	Cellular component	extracellular exosome
GO:1903561	Cellular component	extracellular vesicle
GO:1904949	Cellular component	ATPase complex
GO:0005769	Cellular component	early endosome
GO:0030659	Cellular component	cytoplasmic vesicle membrane
GO:0010008	Cellular component	endosome membrane
GO:0005771	Cellular component	multivesicular body
GO:0030658	Cellular component	transport vesicle membrane
GO:0005770	Cellular component	late endosome
GO:0005741	Cellular component	mitochondrial outer membrane
GO:0000419	Cellular component	RNA polymerase V complex
GO:0044440	Cellular component	endosomal part
GO:0034708	Cellular component	methyltransferase complex
GO:0005798	Cellular component	Golgi-associated vesicle
GO:0000932	Cellular component	P-body
GO:0071013	Cellular component	catalytic step 2 spliceosome
GO:0016591	Cellular component	RNA polymerase II, holoenzyme
GO:0061695	Cellular component	transferase complex, transferring phosphorus-containing groups
GO:0030135	Cellular component	coated vesicle
GO:0016592	Cellular component	mediator complex
GO:0055029	Cellular component	nuclear DNA-directed RNA polymerase complex
GO:0031968	Cellular component	organelle outer membrane
GO:0005643	Cellular component	nuclear pore
GO:0005759	Cellular component	mitochondrial matrix
GO:0005635	Cellular component	nuclear envelope
GO:0016607	Cellular component	nuclear speck
GO:0019867	Cellular component	outer membrane
GO:0044452	Cellular component	nucleolar part
GO:0030532	Cellular component	small nuclear ribonucleoprotein complex
GO:0097525	Cellular component	spliceosomal snRNP complex
GO:0035770	Cellular component	ribonucleoprotein granule
GO:0036464	Cellular component	cytoplasmic ribonucleoprotein granule
GO:0016604	Cellular component	nuclear body
GO:0120114	Cellular component	Sm-like protein family complex
GO:0080008	Cellular component	Cul4-RING E3 ubiquitin ligase complex
GO:0000428	Cellular component	DNA-directed RNA polymerase complex
GO:0030880	Cellular component	RNA polymerase complex
GO:0016469	Cellular component	proton-transporting two-sector ATPase complex
GO:0030684	Cellular component	preribosome
GO:0000502	Cellular component	proteasome complex
GO:1905369	Cellular component	endopeptidase complex
GO:0030133	Cellular component	transport vesicle
GO:0098800	Cellular component	inner mitochondrial membrane protein complex
GO:1905368	Cellular component	peptidase complex
GO:0042788	Cellular component	polysomal ribosome
GO:0044455	Cellular component	mitochondrial membrane part
GO:0022625	Cellular component	cytosolic large ribosomal subunit
GO:0098798	Cellular component	mitochondrial protein complex
GO:0005844	Cellular component	polysome
GO:0005681	Cellular component	spliceosomal complex
GO:0070469	Cellular component	respiratory chain
GO:0015934	Cellular component	large ribosomal subunit
GO:0015935	Cellular component	small ribosomal subunit
GO:0022626	Cellular component	cytosolic ribosome
GO:0044445	Cellular component	cytosolic part
GO:0044391	Cellular component	ribosomal subunit
GO:0009698	Biological process	phenylpropanoid metabolic process
GO:0042546	Biological process	cell wall biogenesis
GO:0072593	Biological process	reactive oxygen species metabolic process
GO:0007017	Biological process	microtubule-based process
GO:0017001	Biological process	antibiotic catabolic process
GO:0007018	Biological process	microtubule-based movement
GO:0042743	Biological process	hydrogen peroxide metabolic process
GO:0009699	Biological process	phenylpropanoid biosynthetic process
GO:0016999	Biological process	antibiotic metabolic process
GO:0009834	Biological process	plant-type secondary cell wall biogenesis
GO:0000272	Biological process	polysaccharide catabolic process
GO:0006928	Biological process	movement of cell or subcellular component
GO:0006855	Biological process	drug transmembrane transport
GO:0042744	Biological process	hydrogen peroxide catabolic process
GO:0006022	Biological process	aminoglycan metabolic process
GO:0009832	Biological process	plant-type cell wall biogenesis
GO:0009808	Biological process	lignin metabolic process
GO:0010036	Biological process	response to boron-containing substance
GO:0015893	Biological process	drug transport
GO:0006026	Biological process	aminoglycan catabolic process
GO:0006030	Biological process	chitin metabolic process
GO:0006032	Biological process	chitin catabolic process
GO:0046348	Biological process	amino sugar catabolic process
GO:1901072	Biological process	glucosamine-containing compound catabolic process
GO:1901071	Biological process	glucosamine-containing compound metabolic process
GO:0009636	Biological process	response to toxic substance
GO:0010393	Biological process	galacturonan metabolic process
GO:0051187	Biological process	cofactor catabolic process
GO:0045488	Biological process	pectin metabolic process
GO:0045490	Biological process	pectin catabolic process
GO:1901136	Biological process	carbohydrate derivative catabolic process
GO:0055081	Biological process	anion homeostasis
GO:0080029	Biological process	cellular response to boron-containing substance levels
GO:0044036	Biological process	cell wall macromolecule metabolic process
GO:0009664	Biological process	plant-type cell wall organization
GO:0006040	Biological process	amino sugar metabolic process
GO:0009813	Biological process	flavonoid biosynthetic process
GO:0009809	Biological process	lignin biosynthetic process
GO:0009812	Biological process	flavonoid metabolic process
GO:0032973	Biological process	amino acid export across plasma membrane
GO:0140115	Biological process	export across plasma membrane
GO:0006865	Biological process	amino acid transport
GO:0080169	Biological process	cellular response to boron-containing substance deprivation
GO:0009309	Biological process	amine biosynthetic process
GO:0042401	Biological process	cellular biogenic amine biosynthetic process
GO:0030244	Biological process	cellulose biosynthetic process
GO:0042545	Biological process	cell wall modification
GO:0009635	Biological process	response to herbicide
GO:0048544	Biological process	recognition of pollen
GO:0034637	Biological process	cellular carbohydrate biosynthetic process
GO:0009717	Biological process	isoflavonoid biosynthetic process
GO:0046287	Biological process	isoflavonoid metabolic process
GO:0010106	Biological process	cellular response to iron ion starvation
GO:0009875	Biological process	pollen-pistil interaction
GO:0008037	Biological process	cell recognition
GO:0000910	Biological process	cytokinesis
GO:0051273	Biological process	beta-glucan metabolic process
GO:0006576	Biological process	cellular biogenic amine metabolic process
GO:0030243	Biological process	cellulose metabolic process
GO:0044106	Biological process	cellular amine metabolic process
GO:0015849	Biological process	organic acid transport
GO:0046942	Biological process	carboxylic acid transport
GO:0009833	Biological process	plant-type primary cell wall biogenesis
GO:0010410	Biological process	hemicellulose metabolic process
GO:0051274	Biological process	beta-glucan biosynthetic process
GO:0031407	Biological process	oxylipin metabolic process
GO:0031408	Biological process	oxylipin biosynthetic process
GO:0045491	Biological process	xylan metabolic process
GO:0015711	Biological process	organic anion transport
GO:0016036	Biological process	cellular response to phosphate starvation
GO:0009308	Biological process	amine metabolic process
GO:0010383	Biological process	cell wall polysaccharide metabolic process
GO:0042447	Biological process	hormone catabolic process
GO:0046271	Biological process	phenylpropanoid catabolic process
GO:1903409	Biological process	reactive oxygen species biosynthetic process
GO:0003333	Biological process	amino acid transmembrane transport
GO:0010200	Biological process	response to chitin
GO:1901562	Biological process	response to paraquat
GO:0046274	Biological process	lignin catabolic process
GO:0031667	Biological process	response to nutrient levels
GO:0019336	Biological process	phenol-containing compound catabolic process
GO:0015853	Biological process	adenine transport
GO:0015854	Biological process	guanine transport
GO:1901616	Biological process	organic hydroxy compound catabolic process
GO:0010315	Biological process	auxin efflux
GO:0010088	Biological process	phloem development
GO:0033692	Biological process	cellular polysaccharide biosynthetic process
GO:2000067	Biological process	regulation of root morphogenesis
GO:0061640	Biological process	cytoskeleton-dependent cytokinesis
GO:0006002	Biological process	fructose 6-phosphate metabolic process
GO:0006551	Biological process	leucine metabolic process
GO:0006883	Biological process	cellular sodium ion homeostasis
GO:0032352	Biological process	positive regulation of hormone metabolic process
GO:0010286	Biological process	heat acclimation
GO:0016998	Biological process	cell wall macromolecule catabolic process
GO:0002215	Biological process	defense response to nematode
GO:0000281	Biological process	mitotic cytokinesis
GO:0006073	Biological process	cellular glucan metabolic process
GO:0044042	Biological process	glucan metabolic process
GO:0015698	Biological process	inorganic anion transport
GO:0006596	Biological process	polyamine biosynthetic process
GO:1903825	Biological process	organic acid transmembrane transport
GO:1905039	Biological process	carboxylic acid transmembrane transport
GO:0009410	Biological process	response to xenobiotic stimulus
GO:0090355	Biological process	positive regulation of auxin metabolic process
GO:0015812	Biological process	gamma-aminobutyric acid transport
GO:0098656	Biological process	anion transmembrane transport
GO:0031669	Biological process	cellular response to nutrient levels
GO:0046244	Biological process	salicylic acid catabolic process
GO:0000271	Biological process	polysaccharide biosynthetic process
GO:0009850	Biological process	auxin metabolic process
GO:0009991	Biological process	response to extracellular stimulus
GO:0042594	Biological process	response to starvation
GO:0015718	Biological process	monocarboxylic acid transport
GO:0016098	Biological process	monoterpenoid metabolic process
GO:0016099	Biological process	monoterpenoid biosynthetic process
GO:0010045	Biological process	response to nickel cation
GO:0019310	Biological process	inositol catabolic process
GO:0071289	Biological process	cellular response to nickel ion
GO:0055072	Biological process	iron ion homeostasis
GO:0016114	Biological process	terpenoid biosynthetic process
GO:0019932	Biological process	second-messenger-mediated signaling
GO:0009958	Biological process	positive gravitropism
GO:0045492	Biological process	xylan biosynthetic process
GO:0007010	Biological process	cytoskeleton organization
GO:0017000	Biological process	antibiotic biosynthetic process
GO:0055090	Biological process	acylglycerol homeostasis
GO:0055091	Biological process	phospholipid homeostasis
GO:0070328	Biological process	triglyceride homeostasis
GO:0072530	Biological process	purine-containing compound transmembrane transport
GO:0008299	Biological process	isoprenoid biosynthetic process
GO:0006721	Biological process	terpenoid metabolic process
GO:0009267	Biological process	cellular response to starvation
GO:0043090	Biological process	amino acid import
GO:0009718	Biological process	anthocyanin-containing compound biosynthetic process
GO:0055083	Biological process	monovalent inorganic anion homeostasis
GO:0042435	Biological process	indole-containing compound biosynthetic process
GO:0006816	Biological process	calcium ion transport
GO:0009395	Biological process	phospholipid catabolic process
GO:0010215	Biological process	cellulose microfibril organization
GO:0030198	Biological process	extracellular matrix organization
GO:0046283	Biological process	anthocyanin-containing compound metabolic process
GO:0006572	Biological process	tyrosine catabolic process
GO:1902884	Biological process	positive regulation of response to oxidative stress
GO:0009751	Biological process	response to salicylic acid
GO:0015837	Biological process	amine transport
GO:0043062	Biological process	extracellular structure organization
GO:0006595	Biological process	polyamine metabolic process
GO:0015074	Biological process	DNA integration
GO:0009938	Biological process	negative regulation of gibberellic acid mediated signaling pathway
GO:0019288	Biological process	isopentenyl diphosphate biosynthetic process, methylerythritol 4-phosphate pathway
GO:1903047	Biological process	mitotic cell cycle process
GO:0010345	Biological process	suberin biosynthetic process
GO:0070592	Biological process	cell wall polysaccharide biosynthetic process
GO:0072523	Biological process	purine-containing compound catabolic process
GO:0042537	Biological process	benzene-containing compound metabolic process
GO:0006521	Biological process	regulation of cellular amino acid metabolic process
GO:0033238	Biological process	regulation of cellular amine metabolic process
GO:0015706	Biological process	nitrate transport
GO:0044038	Biological process	cell wall macromolecule biosynthetic process
GO:0070589	Biological process	cellular component macromolecule biosynthetic process
GO:1903959	Biological process	regulation of anion transmembrane transport
GO:1901699	Biological process	cellular response to nitrogen compound
GO:0044282	Biological process	small molecule catabolic process
GO:0010065	Biological process	primary meristem tissue development
GO:0090354	Biological process	regulation of auxin metabolic process
GO:0007231	Biological process	osmosensory signaling pathway
GO:0055089	Biological process	fatty acid homeostasis
GO:0080167	Biological process	response to karrikin
GO:0009696	Biological process	salicylic acid metabolic process
GO:0016103	Biological process	diterpenoid catabolic process
GO:0043620	Biological process	regulation of DNA-templated transcription in response to stress
GO:0045487	Biological process	gibberellin catabolic process
GO:0000162	Biological process	tryptophan biosynthetic process
GO:0046219	Biological process	indolalkylamine biosynthetic process
GO:0046351	Biological process	disaccharide biosynthetic process
GO:0009835	Biological process	fruit ripening
GO:0006633	Biological process	fatty acid biosynthetic process
GO:0070726	Biological process	cell wall assembly
GO:0071668	Biological process	plant-type cell wall assembly
GO:0009200	Biological process	deoxyribonucleoside triphosphate metabolic process
GO:0080037	Biological process	negative regulation of cytokinin-activated signaling pathway
GO:1904668	Biological process	positive regulation of ubiquitin protein ligase activity
GO:0000226	Biological process	microtubule cytoskeleton organization
GO:0042446	Biological process	hormone biosynthetic process
GO:0048508	Biological process	embryonic meristem development
GO:0016115	Biological process	terpenoid catabolic process
GO:0080144	Biological process	amino acid homeostasis
GO:0006809	Biological process	nitric oxide biosynthetic process
GO:0010068	Biological process	protoderm histogenesis
GO:0015855	Biological process	pyrimidine nucleobase transport
GO:0015857	Biological process	uracil transport
GO:0046209	Biological process	nitric oxide metabolic process
GO:0052863	Biological process	1-deoxy-D-xylulose 5-phosphate metabolic process
GO:0052865	Biological process	1-deoxy-D-xylulose 5-phosphate biosynthetic process
GO:0009627	Biological process	systemic acquired resistance
GO:0009612	Biological process	response to mechanical stimulus
GO:0051050	Biological process	positive regulation of transport
GO:0031668	Biological process	cellular response to extracellular stimulus
GO:0050665	Biological process	hydrogen peroxide biosynthetic process
GO:0000122	Biological process	negative regulation of transcription by RNA polymerase II
GO:0030002	Biological process	cellular anion homeostasis
GO:0030320	Biological process	cellular monovalent inorganic anion homeostasis
GO:0009250	Biological process	glucan biosynthetic process
GO:0055065	Biological process	metal ion homeostasis
GO:1901002	Biological process	positive regulation of response to salt stress
GO:0016126	Biological process	sterol biosynthetic process
GO:0010540	Biological process	basipetal auxin transport
GO:0009262	Biological process	deoxyribonucleotide metabolic process
GO:0002239	Biological process	response to oomycetes
GO:0018958	Biological process	phenol-containing compound metabolic process
GO:0042542	Biological process	response to hydrogen peroxide
GO:0072531	Biological process	pyrimidine-containing compound transmembrane transport
GO:0030865	Biological process	cortical cytoskeleton organization
GO:0009148	Biological process	pyrimidine nucleoside triphosphate biosynthetic process
GO:0006836	Biological process	neurotransmitter transport
GO:1900425	Biological process	negative regulation of defense response to bacterium
GO:0009394	Biological process	2'-deoxyribonucleotide metabolic process
GO:0019692	Biological process	deoxyribose phosphate metabolic process
GO:0006568	Biological process	tryptophan metabolic process
GO:0006586	Biological process	indolalkylamine metabolic process
GO:0019722	Biological process	calcium-mediated signaling
GO:0010941	Biological process	regulation of cell death
GO:0009914	Biological process	hormone transport
GO:0006863	Biological process	purine nucleobase transport
GO:0044070	Biological process	regulation of anion transport
GO:2000280	Biological process	regulation of root development
GO:0009862	Biological process	systemic acquired resistance, salicylic acid mediated signaling pathway
GO:0009147	Biological process	pyrimidine nucleoside triphosphate metabolic process
GO:0071496	Biological process	cellular response to external stimulus
GO:0042430	Biological process	indole-containing compound metabolic process
GO:0009825	Biological process	multidimensional cell growth
GO:0060918	Biological process	auxin transport
GO:1901657	Biological process	glycosyl compound metabolic process
GO:0010167	Biological process	response to nitrate
GO:0048527	Biological process	lateral root development
GO:0006559	Biological process	L-phenylalanine catabolic process
GO:0031398	Biological process	positive regulation of protein ubiquitination
GO:0051443	Biological process	positive regulation of ubiquitin-protein transferase activity
GO:0080001	Biological process	mucilage extrusion from seed coat
GO:1902222	Biological process	erythrose 4-phosphate/phosphoenolpyruvate family amino acid catabolic process
GO:1903322	Biological process	positive regulation of protein modification by small protein conjugation or removal
GO:0046174	Biological process	polyol catabolic process
GO:0032350	Biological process	regulation of hormone metabolic process
GO:0008300	Biological process	isoprenoid catabolic process
GO:0000302	Biological process	response to reactive oxygen species
GO:0046148	Biological process	pigment biosynthetic process
GO:0071417	Biological process	cellular response to organonitrogen compound
GO:0009263	Biological process	deoxyribonucleotide biosynthetic process
GO:1902882	Biological process	regulation of response to oxidative stress
GO:0009269	Biological process	response to desiccation
GO:0006644	Biological process	phospholipid metabolic process
GO:0055076	Biological process	transition metal ion homeostasis
GO:0006023	Biological process	aminoglycan biosynthetic process
GO:0006024	Biological process	glycosaminoglycan biosynthetic process
GO:0006065	Biological process	UDP-glucuronate biosynthetic process
GO:0006552	Biological process	leucine catabolic process
GO:0030203	Biological process	glycosaminoglycan metabolic process
GO:0046398	Biological process	UDP-glucuronate metabolic process
GO:1904666	Biological process	regulation of ubiquitin protein ligase activity
GO:0034765	Biological process	regulation of ion transmembrane transport
GO:0048359	Biological process	mucilage metabolic process involved in seed coat development
GO:0009759	Biological process	indole glucosinolate biosynthetic process
GO:0019048	Biological process	modulation by virus of host morphology or physiology
GO:0051176	Biological process	positive regulation of sulfur metabolic process
GO:0009851	Biological process	auxin biosynthetic process
GO:0043622	Biological process	cortical microtubule organization
GO:0006071	Biological process	glycerol metabolic process
GO:0019400	Biological process	alditol metabolic process
GO:0009074	Biological process	aromatic amino acid family catabolic process
GO:0046164	Biological process	alcohol catabolic process
GO:0010411	Biological process	xyloglucan metabolic process
GO:0009228	Biological process	thiamine biosynthetic process
GO:0042724	Biological process	thiamine-containing compound biosynthetic process
GO:0015851	Biological process	nucleobase transport
GO:0044275	Biological process	cellular carbohydrate catabolic process
GO:0046688	Biological process	response to copper ion
GO:0071230	Biological process	cellular response to amino acid stimulus
GO:0009211	Biological process	pyrimidine deoxyribonucleoside triphosphate metabolic process
GO:0051091	Biological process	positive regulation of DNA-binding transcription factor activity
GO:0071466	Biological process	cellular response to xenobiotic stimulus
GO:0009873	Biological process	ethylene-activated signaling pathway
GO:0030004	Biological process	cellular monovalent inorganic cation homeostasis
GO:0016054	Biological process	organic acid catabolic process
GO:0046395	Biological process	carboxylic acid catabolic process
GO:0097237	Biological process	cellular response to toxic substance
GO:0009072	Biological process	aromatic amino acid family metabolic process
GO:0055078	Biological process	sodium ion homeostasis
GO:0008216	Biological process	spermidine metabolic process
GO:0006949	Biological process	syncytium formation
GO:0009098	Biological process	leucine biosynthetic process
GO:0045493	Biological process	xylan catabolic process
GO:0010191	Biological process	mucilage metabolic process
GO:0006873	Biological process	cellular ion homeostasis
GO:0002229	Biological process	defense response to oomycetes
GO:0051865	Biological process	protein autoubiquitination
GO:0009692	Biological process	ethylene metabolic process
GO:0009693	Biological process	ethylene biosynthetic process
GO:0043449	Biological process	cellular alkene metabolic process
GO:0043450	Biological process	alkene biosynthetic process
GO:0050826	Biological process	response to freezing
GO:1900673	Biological process	olefin metabolic process
GO:1900674	Biological process	olefin biosynthetic process
GO:0071470	Biological process	cellular response to osmotic stress
GO:0010928	Biological process	regulation of auxin mediated signaling pathway
GO:0010102	Biological process	lateral root morphogenesis
GO:0001906	Biological process	cell killing
GO:0006152	Biological process	purine nucleoside catabolic process
GO:0009219	Biological process	pyrimidine deoxyribonucleotide metabolic process
GO:0009221	Biological process	pyrimidine deoxyribonucleotide biosynthetic process
GO:0009265	Biological process	2'-deoxyribonucleotide biosynthetic process
GO:0010262	Biological process	somatic embryogenesis
GO:0031640	Biological process	killing of cells of other organism
GO:0044364	Biological process	disruption of cells of other organism
GO:0046385	Biological process	deoxyribose phosphate biosynthetic process
GO:2001057	Biological process	reactive nitrogen species metabolic process
GO:0019682	Biological process	glyceraldehyde-3-phosphate metabolic process
GO:0051438	Biological process	regulation of ubiquitin-protein transferase activity
GO:0052314	Biological process	phytoalexin metabolic process
GO:0052315	Biological process	phytoalexin biosynthetic process
GO:0032104	Biological process	regulation of response to extracellular stimulus
GO:0032107	Biological process	regulation of response to nutrient levels
GO:0046713	Biological process	borate transport
GO:0048871	Biological process	multicellular organismal homeostasis
GO:0080060	Biological process	integument development
GO:0090378	Biological process	seed trichome elongation
GO:0090559	Biological process	regulation of membrane permeability
GO:0034762	Biological process	regulation of transmembrane transport
GO:0006869	Biological process	lipid transport
GO:0043067	Biological process	regulation of programmed cell death
GO:2000377	Biological process	regulation of reactive oxygen species metabolic process
GO:1901568	Biological process	fatty acid derivative metabolic process
GO:0010101	Biological process	post-embryonic root morphogenesis
GO:0015850	Biological process	organic hydroxy compound transport
GO:0010087	Biological process	phloem or xylem histogenesis
GO:0000082	Biological process	G1/S transition of mitotic cell cycle
GO:0006821	Biological process	chloride transport
GO:0010155	Biological process	regulation of proton transport
GO:1902652	Biological process	secondary alcohol metabolic process
GO:1902653	Biological process	secondary alcohol biosynthetic process
GO:1900424	Biological process	regulation of defense response to bacterium
GO:0006570	Biological process	tyrosine metabolic process
GO:0009083	Biological process	branched-chain amino acid catabolic process
GO:0080036	Biological process	regulation of cytokinin-activated signaling pathway
GO:0043269	Biological process	regulation of ion transport
GO:1901570	Biological process	fatty acid derivative biosynthetic process
GO:0042538	Biological process	hyperosmotic salinity response
GO:0008643	Biological process	carbohydrate transport
GO:0007112	Biological process	male meiosis cytokinesis
GO:0010037	Biological process	response to carbon dioxide
GO:0031145	Biological process	anaphase-promoting complex-dependent catabolic process
GO:0034764	Biological process	positive regulation of transmembrane transport
GO:0061687	Biological process	detoxification of inorganic compound
GO:0072347	Biological process	response to anesthetic
GO:0097501	Biological process	stress response to metal ion
GO:1900459	Biological process	positive regulation of brassinosteroid mediated signaling pathway
GO:1902475	Biological process	L-alpha-amino acid transmembrane transport
GO:2001293	Biological process	malonyl-CoA metabolic process
GO:2001295	Biological process	malonyl-CoA biosynthetic process
GO:0042440	Biological process	pigment metabolic process
GO:0006879	Biological process	cellular iron ion homeostasis
GO:1905421	Biological process	regulation of plant organ morphogenesis
GO:0009063	Biological process	cellular amino acid catabolic process
GO:0006772	Biological process	thiamine metabolic process
GO:0042723	Biological process	thiamine-containing compound metabolic process
GO:0016125	Biological process	sterol metabolic process
GO:0035821	Biological process	modification of morphology or physiology of other organism
GO:0097435	Biological process	supramolecular fiber organization
GO:0006722	Biological process	triterpenoid metabolic process
GO:0016104	Biological process	triterpenoid biosynthetic process
GO:0019742	Biological process	pentacyclic triterpenoid metabolic process
GO:0019745	Biological process	pentacyclic triterpenoid biosynthetic process
GO:0051552	Biological process	flavone metabolic process
GO:0051553	Biological process	flavone biosynthetic process
GO:1900057	Biological process	positive regulation of leaf senescence
GO:1905623	Biological process	positive regulation of leaf development
GO:0031396	Biological process	regulation of protein ubiquitination
GO:0009937	Biological process	regulation of gibberellic acid mediated signaling pathway
GO:0009081	Biological process	branched-chain amino acid metabolic process
GO:0009816	Biological process	defense response to bacterium, incompatible interaction
GO:0006066	Biological process	alcohol metabolic process
GO:1901606	Biological process	alpha-amino acid catabolic process
GO:0010025	Biological process	wax biosynthetic process
GO:0060548	Biological process	negative regulation of cell death
GO:0009968	Biological process	negative regulation of signal transduction
GO:0010648	Biological process	negative regulation of cell communication
GO:0023057	Biological process	negative regulation of signaling
GO:0010310	Biological process	regulation of hydrogen peroxide metabolic process
GO:2000022	Biological process	regulation of jasmonic acid mediated signaling pathway
GO:0009240	Biological process	isopentenyl diphosphate biosynthetic process
GO:0046490	Biological process	isopentenyl diphosphate metabolic process
GO:0006972	Biological process	hyperosmotic response
GO:0051493	Biological process	regulation of cytoskeleton organization
GO:0033206	Biological process	meiotic cytokinesis
GO:0010371	Biological process	regulation of gibberellin biosynthetic process
GO:1902074	Biological process	response to salt
GO:0035690	Biological process	cellular response to drug
GO:0015807	Biological process	L-amino acid transport
GO:0046471	Biological process	phosphatidylglycerol metabolic process
GO:0006081	Biological process	cellular aldehyde metabolic process
GO:0006020	Biological process	inositol metabolic process
GO:0030003	Biological process	cellular cation homeostasis
GO:0009740	Biological process	gibberellic acid mediated signaling pathway
GO:0010476	Biological process	gibberellin mediated signaling pathway
GO:0071370	Biological process	cellular response to gibberellin stimulus
GO:0010214	Biological process	seed coat development
GO:0009624	Biological process	response to nematode
GO:0052546	Biological process	cell wall pectin metabolic process
GO:0009814	Biological process	defense response, incompatible interaction
GO:0062013	Biological process	positive regulation of small molecule metabolic process
GO:0048640	Biological process	negative regulation of developmental growth
GO:0019751	Biological process	polyol metabolic process
GO:0006875	Biological process	cellular metal ion homeostasis
GO:0009611	Biological process	response to wounding
GO:0010166	Biological process	wax metabolic process
GO:0009863	Biological process	salicylic acid mediated signaling pathway
GO:0019374	Biological process	galactolipid metabolic process
GO:0042343	Biological process	indole glucosinolate metabolic process
GO:0042454	Biological process	ribonucleoside catabolic process
GO:1990778	Biological process	protein localization to cell periphery
GO:0007568	Biological process	aging
GO:0009926	Biological process	auxin polar transport
GO:0009788	Biological process	negative regulation of abscisic acid-activated signaling pathway
GO:1901420	Biological process	negative regulation of response to alcohol
GO:1905958	Biological process	negative regulation of cellular response to alcohol
GO:0042136	Biological process	neurotransmitter biosynthetic process
GO:0072511	Biological process	divalent inorganic cation transport
GO:0044843	Biological process	cell cycle G1/S phase transition
GO:1903320	Biological process	regulation of protein modification by small protein conjugation or removal
GO:0031122	Biological process	cytoplasmic microtubule organization
GO:0010876	Biological process	lipid localization
GO:0072350	Biological process	tricarboxylic acid metabolic process
GO:0006072	Biological process	glycerol-3-phosphate metabolic process
GO:0052646	Biological process	alditol phosphate metabolic process
GO:1904062	Biological process	regulation of cation transmembrane transport
GO:0006344	Biological process	maintenance of chromatin silencing
GO:0007076	Biological process	mitotic chromosome condensation
GO:0045827	Biological process	negative regulation of isoprenoid metabolic process
GO:0046902	Biological process	regulation of mitochondrial membrane permeability
GO:0048016	Biological process	inositol phosphate-mediated signaling
GO:1901333	Biological process	positive regulation of lateral root development
GO:0009682	Biological process	induced systemic resistance
GO:0055067	Biological process	monovalent inorganic cation homeostasis
GO:0015976	Biological process	carbon utilization
GO:0042659	Biological process	regulation of cell fate specification
GO:0090376	Biological process	seed trichome differentiation
GO:0009312	Biological process	oligosaccharide biosynthetic process
GO:0009615	Biological process	response to virus
GO:0000919	Biological process	cell plate assembly
GO:2000652	Biological process	regulation of secondary cell wall biogenesis
GO:0009629	Biological process	response to gravity
GO:0051260	Biological process	protein homooligomerization
GO:0009164	Biological process	nucleoside catabolic process
GO:0009683	Biological process	indoleacetic acid metabolic process
GO:0009684	Biological process	indoleacetic acid biosynthetic process
GO:0010067	Biological process	procambium histogenesis
GO:0010444	Biological process	guard mother cell differentiation
GO:0034656	Biological process	nucleobase-containing small molecule catabolic process
GO:1901334	Biological process	lactone metabolic process
GO:1901336	Biological process	lactone biosynthetic process
GO:1901600	Biological process	strigolactone metabolic process
GO:1901601	Biological process	strigolactone biosynthetic process
GO:0045489	Biological process	pectin biosynthetic process
GO:0051262	Biological process	protein tetramerization
GO:0002832	Biological process	negative regulation of response to biotic stimulus
GO:0032102	Biological process	negative regulation of response to external stimulus
GO:0043200	Biological process	response to amino acid
GO:0043901	Biological process	negative regulation of multi-organism process
GO:1903338	Biological process	regulation of cell wall organization or biogenesis
GO:0006241	Biological process	CTP biosynthetic process
GO:0009208	Biological process	pyrimidine ribonucleoside triphosphate metabolic process
GO:0009209	Biological process	pyrimidine ribonucleoside triphosphate biosynthetic process
GO:0009900	Biological process	dehiscence
GO:0046036	Biological process	CTP metabolic process
GO:0009630	Biological process	gravitropism
GO:0070838	Biological process	divalent metal ion transport
GO:0032101	Biological process	regulation of response to external stimulus
GO:0005986	Biological process	sucrose biosynthetic process
GO:0007349	Biological process	cellularization
GO:0009445	Biological process	putrescine metabolic process
GO:0009446	Biological process	putrescine biosynthetic process
GO:0010120	Biological process	camalexin biosynthetic process
GO:0010447	Biological process	response to acidic pH
GO:0043478	Biological process	pigment accumulation in response to UV light
GO:0043479	Biological process	pigment accumulation in tissues in response to UV light
GO:0043480	Biological process	pigment accumulation in tissues
GO:0043481	Biological process	anthocyanin accumulation in tissues in response to UV light
GO:0051554	Biological process	flavonol metabolic process
GO:0051555	Biological process	flavonol biosynthetic process
GO:0052317	Biological process	camalexin metabolic process
GO:0010565	Biological process	regulation of cellular ketone metabolic process
GO:0019432	Biological process	triglyceride biosynthetic process
GO:0000911	Biological process	cytokinesis by cell plate formation
GO:0006268	Biological process	DNA unwinding involved in DNA replication
GO:0006528	Biological process	asparagine metabolic process
GO:0006529	Biological process	asparagine biosynthetic process
GO:0006564	Biological process	L-serine biosynthetic process
GO:0006696	Biological process	ergosterol biosynthetic process
GO:0008204	Biological process	ergosterol metabolic process
GO:0009584	Biological process	detection of visible light
GO:0044107	Biological process	cellular alcohol metabolic process
GO:0044108	Biological process	cellular alcohol biosynthetic process
GO:0046168	Biological process	glycerol-3-phosphate catabolic process
GO:0097384	Biological process	cellular lipid biosynthetic process
GO:0002833	Biological process	positive regulation of response to biotic stimulus
GO:0030036	Biological process	actin cytoskeleton organization
GO:0009963	Biological process	positive regulation of flavonoid biosynthetic process
GO:0048830	Biological process	adventitious root development
GO:2000034	Biological process	regulation of seed maturation
GO:0009827	Biological process	plant-type cell wall modification
GO:0006833	Biological process	water transport
GO:0008544	Biological process	epidermis development
GO:0009913	Biological process	epidermal cell differentiation
GO:0030855	Biological process	epithelial cell differentiation
GO:0042044	Biological process	fluid transport
GO:0005992	Biological process	trehalose biosynthetic process
GO:0071732	Biological process	cellular response to nitric oxide
GO:0009697	Biological process	salicylic acid biosynthetic process
GO:0030104	Biological process	water homeostasis
GO:0042547	Biological process	cell wall modification involved in multidimensional cell growth
GO:0016144	Biological process	S-glycoside biosynthetic process
GO:0019758	Biological process	glycosinolate biosynthetic process
GO:0019761	Biological process	glucosinolate biosynthetic process
GO:0007140	Biological process	male meiotic nuclear division
GO:0046113	Biological process	nucleobase catabolic process
GO:0070919	Biological process	production of siRNA involved in chromatin silencing by small RNA
GO:0008202	Biological process	steroid metabolic process
GO:0009625	Biological process	response to insect
GO:0072527	Biological process	pyrimidine-containing compound metabolic process
GO:0051338	Biological process	regulation of transferase activity
GO:0010072	Biological process	primary shoot apical meristem specification
GO:0071731	Biological process	response to nitric oxide
GO:0097366	Biological process	response to bronchodilator
GO:0048528	Biological process	post-embryonic root development
GO:0006012	Biological process	galactose metabolic process
GO:0032956	Biological process	regulation of actin cytoskeleton organization
GO:0032970	Biological process	regulation of actin filament-based process
GO:0002237	Biological process	response to molecule of bacterial origin
GO:0007141	Biological process	male meiosis I
GO:0009806	Biological process	lignan metabolic process
GO:0009807	Biological process	lignan biosynthetic process
GO:0034969	Biological process	histone arginine methylation
GO:0072337	Biological process	modified amino acid transport
GO:0006694	Biological process	steroid biosynthetic process
GO:0043069	Biological process	negative regulation of programmed cell death
GO:0009739	Biological process	response to gibberellin
GO:0046916	Biological process	cellular transition metal ion homeostasis
GO:0009606	Biological process	tropism
GO:0016101	Biological process	diterpenoid metabolic process
GO:0019852	Biological process	L-ascorbic acid metabolic process
GO:0019853	Biological process	L-ascorbic acid biosynthetic process
GO:0072505	Biological process	divalent inorganic anion homeostasis
GO:0009251	Biological process	glucan catabolic process
GO:0042126	Biological process	nitrate metabolic process
GO:0042128	Biological process	nitrate assimilation
GO:0005983	Biological process	starch catabolic process
GO:0008295	Biological process	spermidine biosynthetic process
GO:0043476	Biological process	pigment accumulation
GO:0046886	Biological process	positive regulation of hormone biosynthetic process
GO:0098739	Biological process	import across plasma membrane
GO:0071446	Biological process	cellular response to salicylic acid stimulus
GO:0072528	Biological process	pyrimidine-containing compound biosynthetic process
GO:0032506	Biological process	cytokinetic process
GO:1902410	Biological process	mitotic cytokinetic process
GO:0006641	Biological process	triglyceride metabolic process
GO:0006558	Biological process	L-phenylalanine metabolic process
GO:1902221	Biological process	erythrose 4-phosphate/phosphoenolpyruvate family amino acid metabolic process
GO:0042180	Biological process	cellular ketone metabolic process
GO:0046460	Biological process	neutral lipid biosynthetic process
GO:0046463	Biological process	acylglycerol biosynthetic process
GO:0051259	Biological process	protein complex oligomerization
GO:0051017	Biological process	actin filament bundle assembly
GO:0051289	Biological process	protein homotetramerization
GO:0055062	Biological process	phosphate ion homeostasis
GO:0061572	Biological process	actin filament bundle organization
GO:0072506	Biological process	trivalent inorganic anion homeostasis
GO:1900457	Biological process	regulation of brassinosteroid mediated signaling pathway
GO:0042278	Biological process	purine nucleoside metabolic process
GO:0046133	Biological process	pyrimidine ribonucleoside catabolic process
GO:0046135	Biological process	pyrimidine nucleoside catabolic process
GO:0046835	Biological process	carbohydrate phosphorylation
GO:0009685	Biological process	gibberellin metabolic process
GO:0044003	Biological process	modification by symbiont of host morphology or physiology
GO:0009831	Biological process	plant-type cell wall modification involved in multidimensional cell growth
GO:0015804	Biological process	neutral amino acid transport
GO:0006591	Biological process	ornithine metabolic process
GO:0055082	Biological process	cellular chemical homeostasis
GO:0032103	Biological process	positive regulation of response to external stimulus
GO:0051607	Biological process	defense response to virus
GO:0006074	Biological process	(1->3)-beta-D-glucan metabolic process
GO:0009292	Biological process	genetic transfer
GO:0009294	Biological process	DNA mediated transformation
GO:0007267	Biological process	cell-cell signaling
GO:2001023	Biological process	regulation of response to drug
GO:2001038	Biological process	regulation of cellular response to drug
GO:0097164	Biological process	ammonium ion metabolic process
GO:0009403	Biological process	toxin biosynthetic process
GO:0015908	Biological process	fatty acid transport
GO:1900140	Biological process	regulation of seedling development
GO:0010022	Biological process	meristem determinacy
GO:0071236	Biological process	cellular response to antibiotic
GO:0000038	Biological process	very long-chain fatty acid metabolic process
GO:0006517	Biological process	protein deglycosylation
GO:0010395	Biological process	rhamnogalacturonan I metabolic process
GO:0010400	Biological process	rhamnogalacturonan I side chain metabolic process
GO:0018216	Biological process	peptidyl-arginine methylation
GO:0046473	Biological process	phosphatidic acid metabolic process
GO:0034285	Biological process	response to disaccharide
GO:0043902	Biological process	positive regulation of multi-organism process
GO:1900426	Biological process	positive regulation of defense response to bacterium
GO:0009700	Biological process	indole phytoalexin biosynthetic process
GO:0032465	Biological process	regulation of cytokinesis
GO:0046217	Biological process	indole phytoalexin metabolic process
GO:0046824	Biological process	positive regulation of nucleocytoplasmic transport
GO:2000306	Biological process	positive regulation of photomorphogenesis
GO:0046885	Biological process	regulation of hormone biosynthetic process
GO:0010942	Biological process	positive regulation of cell death
GO:0009853	Biological process	photorespiration
GO:0045333	Biological process	cellular respiration
GO:0015780	Biological process	nucleotide-sugar transmembrane transport
GO:1902290	Biological process	positive regulation of defense response to oomycetes
GO:0044247	Biological process	cellular polysaccharide catabolic process
GO:0010193	Biological process	response to ozone
GO:1902170	Biological process	cellular response to reactive nitrogen species
GO:0044764	Biological process	multi-organism cellular process
GO:0070507	Biological process	regulation of microtubule cytoskeleton organization
GO:0051347	Biological process	positive regulation of transferase activity
GO:0034308	Biological process	primary alcohol metabolic process
GO:0042761	Biological process	very long-chain fatty acid biosynthetic process
GO:0008654	Biological process	phospholipid biosynthetic process
GO:0005984	Biological process	disaccharide metabolic process
GO:0009644	Biological process	response to high light intensity
GO:0008361	Biological process	regulation of cell size
GO:0052482	Biological process	defense response by cell wall thickening
GO:0052544	Biological process	defense response by callose deposition in cell wall
GO:0006144	Biological process	purine nucleobase metabolic process
GO:0002831	Biological process	regulation of response to biotic stimulus
GO:0030422	Biological process	production of siRNA involved in RNA interference
GO:0051817	Biological process	modification of morphology or physiology of other organism involved in symbiotic interaction
GO:0032351	Biological process	negative regulation of hormone metabolic process
GO:0032353	Biological process	negative regulation of hormone biosynthetic process
GO:0006270	Biological process	DNA replication initiation
GO:0010050	Biological process	vegetative phase change
GO:0044093	Biological process	positive regulation of molecular function
GO:0009720	Biological process	detection of hormone stimulus
GO:0009726	Biological process	detection of endogenous stimulus
GO:0015714	Biological process	phosphoenolpyruvate transport
GO:0015717	Biological process	triose phosphate transport
GO:0015791	Biological process	polyol transport
GO:0015798	Biological process	myo-inositol transport
GO:0035436	Biological process	triose phosphate transmembrane transport
GO:0043488	Biological process	regulation of mRNA stability
GO:0046434	Biological process	organophosphate catabolic process
GO:0005991	Biological process	trehalose metabolic process
GO:0016102	Biological process	diterpenoid biosynthetic process
GO:0034754	Biological process	cellular hormone metabolic process
GO:0051701	Biological process	interaction with host
GO:1902288	Biological process	regulation of defense response to oomycetes
GO:0007051	Biological process	spindle organization
GO:0046364	Biological process	monosaccharide biosynthetic process
GO:0006638	Biological process	neutral lipid metabolic process
GO:0006639	Biological process	acylglycerol metabolic process
GO:0019747	Biological process	regulation of isoprenoid metabolic process
GO:0015980	Biological process	energy derivation by oxidation of organic compounds
GO:0009073	Biological process	aromatic amino acid family biosynthetic process
GO:0000079	Biological process	regulation of cyclin-dependent protein serine/threonine kinase activity
GO:0006560	Biological process	proline metabolic process
GO:0006573	Biological process	valine metabolic process
GO:0010030	Biological process	positive regulation of seed germination
GO:1904029	Biological process	regulation of cyclin-dependent protein kinase activity
GO:0009116	Biological process	nucleoside metabolic process
GO:0009854	Biological process	oxidative photosynthetic carbon pathway
GO:0048759	Biological process	xylem vessel member cell differentiation
GO:0071323	Biological process	cellular response to chitin
GO:2000068	Biological process	regulation of defense response to insect
GO:0034219	Biological process	carbohydrate transmembrane transport
GO:0006885	Biological process	regulation of pH
GO:0043455	Biological process	regulation of secondary metabolic process
GO:0090307	Biological process	mitotic spindle assembly
GO:0090481	Biological process	pyrimidine nucleotide-sugar transmembrane transport
GO:0008298	Biological process	intracellular mRNA localization
GO:0018195	Biological process	peptidyl-arginine modification
GO:0032922	Biological process	circadian regulation of gene expression
GO:0042873	Biological process	aldonate transmembrane transport
GO:0090480	Biological process	purine nucleotide-sugar transmembrane transport
GO:1900367	Biological process	positive regulation of defense response to insect
GO:2000033	Biological process	regulation of seed dormancy process
GO:0060429	Biological process	epithelium development
GO:0071941	Biological process	nitrogen cycle metabolic process
GO:0010029	Biological process	regulation of seed germination
GO:0009099	Biological process	valine biosynthetic process
GO:0010196	Biological process	nonphotochemical quenching
GO:1990066	Biological process	energy quenching
GO:0071241	Biological process	cellular response to inorganic substance
GO:0030029	Biological process	actin filament-based process
GO:0043562	Biological process	cellular response to nitrogen levels
GO:0010267	Biological process	production of ta-siRNAs involved in RNA interference
GO:0071219	Biological process	cellular response to molecule of bacterial origin
GO:1902584	Biological process	positive regulation of response to water deprivation
GO:0007052	Biological process	mitotic spindle organization
GO:0009082	Biological process	branched-chain amino acid biosynthetic process
GO:0090421	Biological process	embryonic meristem initiation
GO:1902850	Biological process	microtubule cytoskeleton organization involved in mitosis
GO:0009070	Biological process	serine family amino acid biosynthetic process
GO:0006090	Biological process	pyruvate metabolic process
GO:0006730	Biological process	one-carbon metabolic process
GO:0019375	Biological process	galactolipid biosynthetic process
GO:0030497	Biological process	fatty acid elongation
GO:0016143	Biological process	S-glycoside metabolic process
GO:0019757	Biological process	glycosinolate metabolic process
GO:0019760	Biological process	glucosinolate metabolic process
GO:0006220	Biological process	pyrimidine nucleotide metabolic process
GO:0006221	Biological process	pyrimidine nucleotide biosynthetic process
GO:0072329	Biological process	monocarboxylic acid catabolic process
GO:1901617	Biological process	organic hydroxy compound biosynthetic process
GO:0006563	Biological process	L-serine metabolic process
GO:0006817	Biological process	phosphate ion transport
GO:0000054	Biological process	ribosomal subunit export from nucleus
GO:0000105	Biological process	histidine biosynthetic process
GO:0006547	Biological process	histidine metabolic process
GO:0032388	Biological process	positive regulation of intracellular transport
GO:0033750	Biological process	ribosome localization
GO:0043473	Biological process	pigmentation
GO:0051222	Biological process	positive regulation of protein transport
GO:0052541	Biological process	plant-type cell wall cellulose metabolic process
GO:0052803	Biological process	imidazole-containing compound metabolic process
GO:0060236	Biological process	regulation of mitotic spindle organization
GO:0070370	Biological process	cellular heat acclimation
GO:0090224	Biological process	regulation of spindle organization
GO:0090316	Biological process	positive regulation of intracellular protein transport
GO:1903829	Biological process	positive regulation of cellular protein localization
GO:1904951	Biological process	positive regulation of establishment of protein localization
GO:0008284	Biological process	positive regulation of cell proliferation
GO:0010359	Biological process	regulation of anion channel activity
GO:0032875	Biological process	regulation of DNA endoreduplication
GO:2000379	Biological process	positive regulation of reactive oxygen species metabolic process
GO:0006099	Biological process	tricarboxylic acid cycle
GO:0006101	Biological process	citrate metabolic process
GO:0001927	Biological process	exocyst assembly
GO:0006169	Biological process	adenosine salvage
GO:0009264	Biological process	deoxyribonucleotide catabolic process
GO:0015840	Biological process	urea transport
GO:0046086	Biological process	adenosine biosynthetic process
GO:0046505	Biological process	sulfolipid metabolic process
GO:0046506	Biological process	sulfolipid biosynthetic process
GO:0051973	Biological process	positive regulation of telomerase activity
GO:1901672	Biological process	positive regulation of systemic acquired resistance
GO:1902626	Biological process	assembly of large subunit precursor of preribosome
GO:2000573	Biological process	positive regulation of DNA biosynthetic process
GO:2001009	Biological process	regulation of plant-type cell wall cellulose biosynthetic process
GO:0016106	Biological process	sesquiterpenoid biosynthetic process
GO:0009744	Biological process	response to sucrose
GO:0044419	Biological process	interspecies interaction between organisms
GO:0006857	Biological process	oligopeptide transport
GO:0010089	Biological process	xylem development
GO:0051225	Biological process	spindle assembly
GO:0010374	Biological process	stomatal complex development
GO:0009060	Biological process	aerobic respiration
GO:0009641	Biological process	shade avoidance
GO:0046323	Biological process	glucose import
GO:1904659	Biological process	glucose transmembrane transport
GO:1901607	Biological process	alpha-amino acid biosynthetic process
GO:0006655	Biological process	phosphatidylglycerol biosynthetic process
GO:0019740	Biological process	nitrogen utilization
GO:0032776	Biological process	DNA methylation on cytosine
GO:0042219	Biological process	cellular modified amino acid catabolic process
GO:0043171	Biological process	peptide catabolic process
GO:0009904	Biological process	chloroplast accumulation movement
GO:0006828	Biological process	manganese ion transport
GO:0009750	Biological process	response to fructose
GO:0009901	Biological process	anther dehiscence
GO:0051090	Biological process	regulation of DNA-binding transcription factor activity
GO:0071456	Biological process	cellular response to hypoxia
GO:0044272	Biological process	sulfur compound biosynthetic process
GO:0007015	Biological process	actin filament organization
GO:0044242	Biological process	cellular lipid catabolic process
GO:0008645	Biological process	hexose transmembrane transport
GO:0009686	Biological process	gibberellin biosynthetic process
GO:0006995	Biological process	cellular response to nitrogen starvation
GO:0009962	Biological process	regulation of flavonoid biosynthetic process
GO:0051181	Biological process	cofactor transport
GO:1901659	Biological process	glycosyl compound biosynthetic process
GO:0010192	Biological process	mucilage biosynthetic process
GO:0051275	Biological process	beta-glucan catabolic process
GO:0052325	Biological process	cell wall pectin biosynthetic process
GO:0010150	Biological process	leaf senescence
GO:0006535	Biological process	cysteine biosynthetic process from serine
GO:0006777	Biological process	Mo-molybdopterin cofactor biosynthetic process
GO:0019720	Biological process	Mo-molybdopterin cofactor metabolic process
GO:0043545	Biological process	molybdopterin cofactor metabolic process
GO:0045037	Biological process	protein import into chloroplast stroma
GO:0051189	Biological process	prosthetic group metabolic process
GO:0090329	Biological process	regulation of DNA-dependent DNA replication
GO:0006183	Biological process	GTP biosynthetic process
GO:0006597	Biological process	spermine biosynthetic process
GO:0006848	Biological process	pyruvate transport
GO:0009800	Biological process	cinnamic acid biosynthetic process
GO:0010322	Biological process	regulation of isopentenyl diphosphate biosynthetic process, methylerythritol 4-phosphate pathway
GO:0010981	Biological process	regulation of cell wall macromolecule metabolic process
GO:0015691	Biological process	cadmium ion transport
GO:0031539	Biological process	positive regulation of anthocyanin metabolic process
GO:0034227	Biological process	tRNA thio-modification
GO:0035435	Biological process	phosphate ion transmembrane transport
GO:0042891	Biological process	antibiotic transport
GO:0051099	Biological process	positive regulation of binding
GO:0051214	Biological process	RNA virus induced gene silencing
GO:0071071	Biological process	regulation of phospholipid biosynthetic process
GO:0080151	Biological process	positive regulation of salicylic acid mediated signaling pathway
GO:1903725	Biological process	regulation of phospholipid metabolic process
GO:2001025	Biological process	positive regulation of response to drug
GO:2001040	Biological process	positive regulation of cellular response to drug
GO:0009642	Biological process	response to light intensity
GO:0009743	Biological process	response to carbohydrate
GO:0055075	Biological process	potassium ion homeostasis
GO:0031540	Biological process	regulation of anthocyanin biosynthetic process
GO:0042372	Biological process	phylloquinone biosynthetic process
GO:0042374	Biological process	phylloquinone metabolic process
GO:0045597	Biological process	positive regulation of cell differentiation
GO:2000023	Biological process	regulation of lateral root development
GO:0009064	Biological process	glutamine family amino acid metabolic process
GO:0007050	Biological process	cell cycle arrest
GO:0015800	Biological process	acidic amino acid transport
GO:0016137	Biological process	glycoside metabolic process
GO:0016138	Biological process	glycoside biosynthetic process
GO:0030007	Biological process	cellular potassium ion homeostasis
GO:0048017	Biological process	inositol lipid-mediated signaling
GO:0051055	Biological process	negative regulation of lipid biosynthetic process
GO:0071324	Biological process	cellular response to disaccharide stimulus
GO:1901070	Biological process	guanosine-containing compound biosynthetic process
GO:0071216	Biological process	cellular response to biotic stimulus
GO:0071472	Biological process	cellular response to salt stress
GO:0015749	Biological process	monosaccharide transmembrane transport
GO:0006714	Biological process	sesquiterpenoid metabolic process
GO:0016246	Biological process	RNA interference
GO:0009408	Biological process	response to heat
GO:0047484	Biological process	regulation of response to osmotic stress
GO:0010440	Biological process	stomatal lineage progression
GO:0009736	Biological process	cytokinin-activated signaling pathway
GO:0002252	Biological process	immune effector process
GO:0010099	Biological process	regulation of photomorphogenesis
GO:2000031	Biological process	regulation of salicylic acid mediated signaling pathway
GO:0044772	Biological process	mitotic cell cycle phase transition
GO:0010143	Biological process	cutin biosynthetic process
GO:0052542	Biological process	defense response by callose deposition
GO:0006636	Biological process	unsaturated fatty acid biosynthetic process
GO:0033559	Biological process	unsaturated fatty acid metabolic process
GO:0042451	Biological process	purine nucleoside biosynthetic process
GO:0046129	Biological process	purine ribonucleoside biosynthetic process
GO:0042133	Biological process	neurotransmitter metabolic process
GO:0046128	Biological process	purine ribonucleoside metabolic process
GO:0006561	Biological process	proline biosynthetic process
GO:0010227	Biological process	floral organ abscission
GO:0010600	Biological process	regulation of auxin biosynthetic process
GO:0002097	Biological process	tRNA wobble base modification
GO:0006536	Biological process	glutamate metabolic process
GO:0007088	Biological process	regulation of mitotic nuclear division
GO:0033047	Biological process	regulation of mitotic sister chromatid segregation
GO:0043068	Biological process	positive regulation of programmed cell death
GO:0080050	Biological process	regulation of seed development
GO:0001704	Biological process	formation of primary germ layer
GO:0001706	Biological process	endoderm formation
GO:0006089	Biological process	lactate metabolic process
GO:0006801	Biological process	superoxide metabolic process
GO:0007369	Biological process	gastrulation
GO:0007492	Biological process	endoderm development
GO:0030261	Biological process	chromosome condensation
GO:0035987	Biological process	endodermal cell differentiation
GO:0046898	Biological process	response to cycloheximide
GO:0051049	Biological process	regulation of transport
GO:0090693	Biological process	plant organ senescence
GO:0042335	Biological process	cuticle development
GO:0006751	Biological process	glutathione catabolic process
GO:0009558	Biological process	embryo sac cellularization
GO:0010031	Biological process	circumnutation
GO:0010601	Biological process	positive regulation of auxin biosynthetic process
GO:0016572	Biological process	histone phosphorylation
GO:0019755	Biological process	one-carbon compound transport
GO:0032365	Biological process	intracellular lipid transport
GO:0034497	Biological process	protein localization to phagophore assembly site
GO:0048317	Biological process	seed morphogenesis
GO:0050879	Biological process	multicellular organismal movement
GO:0051754	Biological process	meiotic sister chromatid cohesion, centromeric
GO:0080168	Biological process	abscisic acid transport
GO:1901141	Biological process	regulation of lignin biosynthetic process
GO:1902347	Biological process	response to strigolactone
GO:0042182	Biological process	ketone catabolic process
GO:0016032	Biological process	viral process
GO:0071368	Biological process	cellular response to cytokinin stimulus
GO:0034284	Biological process	response to monosaccharide
GO:1901000	Biological process	regulation of response to salt stress
GO:0006890	Biological process	retrograde vesicle-mediated transport, Golgi to ER
GO:0010103	Biological process	stomatal complex morphogenesis
GO:0046486	Biological process	glycerolipid metabolic process
GO:1901264	Biological process	carbohydrate derivative transport
GO:0000255	Biological process	allantoin metabolic process
GO:0006265	Biological process	DNA topological change
GO:0009268	Biological process	response to pH
GO:0009616	Biological process	virus induced gene silencing
GO:0052018	Biological process	modulation by symbiont of RNA levels in host
GO:0052249	Biological process	modulation of RNA levels in other organism involved in symbiotic interaction
GO:0071407	Biological process	cellular response to organic cyclic compound
GO:0001505	Biological process	regulation of neurotransmitter levels
GO:0046131	Biological process	pyrimidine ribonucleoside metabolic process
GO:0062012	Biological process	regulation of small molecule metabolic process
GO:0032886	Biological process	regulation of microtubule-based process
GO:0046189	Biological process	phenol-containing compound biosynthetic process
GO:0009065	Biological process	glutamine family amino acid catabolic process
GO:0010364	Biological process	regulation of ethylene biosynthetic process
GO:0010623	Biological process	programmed cell death involved in cell development
GO:0031335	Biological process	regulation of sulfur amino acid metabolic process
GO:0045833	Biological process	negative regulation of lipid metabolic process
GO:0046185	Biological process	aldehyde catabolic process
GO:1900908	Biological process	regulation of olefin metabolic process
GO:1900911	Biological process	regulation of olefin biosynthetic process
GO:0007091	Biological process	metaphase/anaphase transition of mitotic cell cycle
GO:0010965	Biological process	regulation of mitotic sister chromatid separation
GO:0016024	Biological process	CDP-diacylglycerol biosynthetic process
GO:0030071	Biological process	regulation of mitotic metaphase/anaphase transition
GO:0044784	Biological process	metaphase/anaphase transition of cell cycle
GO:0046341	Biological process	CDP-diacylglycerol metabolic process
GO:0051306	Biological process	mitotic sister chromatid separation
GO:1902099	Biological process	regulation of metaphase/anaphase transition of cell cycle
GO:1905818	Biological process	regulation of chromosome separation
GO:0001666	Biological process	response to hypoxia
GO:0140014	Biological process	mitotic nuclear division
GO:0044273	Biological process	sulfur compound catabolic process
GO:0046777	Biological process	protein autophosphorylation
GO:0006213	Biological process	pyrimidine nucleoside metabolic process
GO:0055088	Biological process	lipid homeostasis
GO:0000304	Biological process	response to singlet oxygen
GO:0002100	Biological process	tRNA wobble adenosine to inosine editing
GO:0006382	Biological process	adenosine to inosine editing
GO:0009157	Biological process	deoxyribonucleoside monophosphate biosynthetic process
GO:0009162	Biological process	deoxyribonucleoside monophosphate metabolic process
GO:0009176	Biological process	pyrimidine deoxyribonucleoside monophosphate metabolic process
GO:0009177	Biological process	pyrimidine deoxyribonucleoside monophosphate biosynthetic process
GO:0009233	Biological process	menaquinone metabolic process
GO:0009234	Biological process	menaquinone biosynthetic process
GO:0009803	Biological process	cinnamic acid metabolic process
GO:0032950	Biological process	regulation of beta-glucan metabolic process
GO:0032951	Biological process	regulation of beta-glucan biosynthetic process
GO:0035264	Biological process	multicellular organism growth
GO:0042550	Biological process	photosystem I stabilization
GO:0046085	Biological process	adenosine metabolic process
GO:0051512	Biological process	positive regulation of unidimensional cell growth
GO:0051972	Biological process	regulation of telomerase activity
GO:0072334	Biological process	UDP-galactose transmembrane transport
GO:1900378	Biological process	positive regulation of secondary metabolite biosynthetic process
GO:1902066	Biological process	regulation of cell wall pectin metabolic process
GO:1990748	Biological process	cellular detoxification
GO:2001006	Biological process	regulation of cellulose biosynthetic process
GO:0002098	Biological process	tRNA wobble uridine modification
GO:0072529	Biological process	pyrimidine-containing compound catabolic process
GO:2000762	Biological process	regulation of phenylpropanoid metabolic process
GO:0009749	Biological process	response to glucose
GO:0071900	Biological process	regulation of protein serine/threonine kinase activity
GO:0045859	Biological process	regulation of protein kinase activity
GO:0098754	Biological process	detoxification
GO:0016109	Biological process	tetraterpenoid biosynthetic process
GO:0016117	Biological process	carotenoid biosynthetic process
GO:0031537	Biological process	regulation of anthocyanin metabolic process
GO:0006415	Biological process	translational termination
GO:0010582	Biological process	floral meristem determinacy
GO:0009820	Biological process	alkaloid metabolic process
GO:0010311	Biological process	lateral root formation
GO:0032535	Biological process	regulation of cellular component size
GO:0090066	Biological process	regulation of anatomical structure size
GO:0010043	Biological process	response to zinc ion
GO:0030641	Biological process	regulation of cellular pH
GO:0051453	Biological process	regulation of intracellular pH
GO:1901987	Biological process	regulation of cell cycle phase transition
GO:0006094	Biological process	gluconeogenesis
GO:0045815	Biological process	positive regulation of gene expression, epigenetic
GO:1905177	Biological process	tracheary element differentiation
GO:0009867	Biological process	jasmonic acid mediated signaling pathway
GO:0032147	Biological process	activation of protein kinase activity
GO:0006075	Biological process	(1->3)-beta-D-glucan biosynthetic process
GO:0010112	Biological process	regulation of systemic acquired resistance
GO:0022898	Biological process	regulation of transmembrane transporter activity
GO:0032409	Biological process	regulation of transporter activity
GO:0032412	Biological process	regulation of ion transmembrane transporter activity
GO:0044770	Biological process	cell cycle phase transition
GO:0000266	Biological process	mitochondrial fission
GO:0030838	Biological process	positive regulation of actin filament polymerization
GO:0045010	Biological process	actin nucleation
GO:0000050	Biological process	urea cycle
GO:0000055	Biological process	ribosomal large subunit export from nucleus
GO:0006574	Biological process	valine catabolic process
GO:0009313	Biological process	oligosaccharide catabolic process
GO:0010239	Biological process	chloroplast mRNA processing
GO:0015846	Biological process	polyamine transport
GO:0033273	Biological process	response to vitamin
GO:0045962	Biological process	positive regulation of development, heterochronic
GO:0046621	Biological process	negative regulation of organ growth
GO:0046864	Biological process	isoprenoid transport
GO:0046865	Biological process	terpenoid transport
GO:0048577	Biological process	negative regulation of short-day photoperiodism, flowering
GO:0052324	Biological process	plant-type cell wall cellulose biosynthetic process
GO:0060148	Biological process	positive regulation of posttranscriptional gene silencing
GO:0090708	Biological process	specification of plant organ axis polarity
GO:1902117	Biological process	positive regulation of organelle assembly
GO:1901990	Biological process	regulation of mitotic cell cycle phase transition
GO:0007346	Biological process	regulation of mitotic cell cycle
GO:0008064	Biological process	regulation of actin polymerization or depolymerization
GO:0030832	Biological process	regulation of actin filament length
GO:0110053	Biological process	regulation of actin filament organization
GO:0042181	Biological process	ketone biosynthetic process
GO:0006545	Biological process	glycine biosynthetic process
GO:0010726	Biological process	positive regulation of hydrogen peroxide metabolic process
GO:0043487	Biological process	regulation of RNA stability
GO:0044458	Biological process	motile cilium assembly
GO:0051592	Biological process	response to calcium ion
GO:0060992	Biological process	response to fungicide
GO:0009845	Biological process	seed germination
GO:0006549	Biological process	isoleucine metabolic process
GO:0006825	Biological process	copper ion transport
GO:0009097	Biological process	isoleucine biosynthetic process
GO:0010453	Biological process	regulation of cell fate commitment
GO:1902183	Biological process	regulation of shoot apical meristem development
GO:0001932	Biological process	regulation of protein phosphorylation
GO:0010216	Biological process	maintenance of DNA methylation
GO:0045995	Biological process	regulation of embryonic development
GO:0046839	Biological process	phospholipid dephosphorylation
GO:0046856	Biological process	phosphatidylinositol dephosphorylation
GO:1901658	Biological process	glycosyl compound catabolic process
GO:0010091	Biological process	trichome branching
GO:0052543	Biological process	callose deposition in cell wall
GO:0009746	Biological process	response to hexose
GO:0009119	Biological process	ribonucleoside metabolic process
GO:0043549	Biological process	regulation of kinase activity
GO:0000041	Biological process	transition metal ion transport
GO:0015748	Biological process	organophosphate ester transport
GO:0019344	Biological process	cysteine biosynthetic process
GO:0033045	Biological process	regulation of sister chromatid segregation
GO:0010225	Biological process	response to UV-C
GO:0019319	Biological process	hexose biosynthetic process
GO:0031048	Biological process	chromatin silencing by small RNA
GO:0036294	Biological process	cellular response to decreased oxygen levels
GO:0071453	Biological process	cellular response to oxygen levels
GO:0098586	Biological process	cellular response to virus
GO:0000422	Biological process	autophagy of mitochondrion
GO:0010116	Biological process	positive regulation of abscisic acid biosynthetic process
GO:0015696	Biological process	ammonium transport
GO:0034508	Biological process	centromere complex assembly
GO:0044804	Biological process	autophagy of nucleus
GO:0050829	Biological process	defense response to Gram-negative bacterium
GO:0061726	Biological process	mitochondrion disassembly
GO:0006021	Biological process	inositol biosynthetic process
GO:0008215	Biological process	spermine metabolic process
GO:0009051	Biological process	pentose-phosphate shunt, oxidative branch
GO:0009298	Biological process	GDP-mannose biosynthetic process
GO:0009647	Biological process	skotomorphogenesis
GO:0036377	Biological process	arbuscular mycorrhizal association
GO:0044211	Biological process	CTP salvage
GO:0046039	Biological process	GTP metabolic process
GO:0046825	Biological process	regulation of protein export from nucleus
GO:0061014	Biological process	positive regulation of mRNA catabolic process
GO:2000278	Biological process	regulation of DNA biosynthetic process
GO:0009646	Biological process	response to absence of light
GO:1900055	Biological process	regulation of leaf senescence
GO:0044403	Biological process	symbiont process
GO:0006813	Biological process	potassium ion transport
GO:0000070	Biological process	mitotic sister chromatid segregation
GO:0016129	Biological process	phytosteroid biosynthetic process
GO:0052386	Biological process	cell wall thickening
GO:0010014	Biological process	meristem initiation
GO:0010229	Biological process	inflorescence development
GO:0009903	Biological process	chloroplast avoidance movement
GO:0042364	Biological process	water-soluble vitamin biosynthetic process
GO:0009610	Biological process	response to symbiotic fungus
GO:0009934	Biological process	regulation of meristem structural organization
GO:0010274	Biological process	hydrotropism
GO:0034629	Biological process	cellular protein-containing complex localization
GO:0044782	Biological process	cilium organization
GO:0060271	Biological process	cilium assembly
GO:0120031	Biological process	plasma membrane bounded cell projection assembly
GO:0120036	Biological process	plasma membrane bounded cell projection organization
GO:1901654	Biological process	response to ketone
GO:1990641	Biological process	response to iron ion starvation
GO:0006013	Biological process	mannose metabolic process
GO:0009113	Biological process	purine nucleobase biosynthetic process
GO:0010069	Biological process	zygote asymmetric cytokinesis in embryo sac
GO:0010272	Biological process	response to silver ion
GO:0010289	Biological process	homogalacturonan biosynthetic process
GO:0010394	Biological process	homogalacturonan metabolic process
GO:0010412	Biological process	mannan metabolic process
GO:0019441	Biological process	tryptophan catabolic process to kynurenine
GO:0019627	Biological process	urea metabolic process
GO:0033158	Biological process	regulation of protein import into nucleus, translocation
GO:0033160	Biological process	positive regulation of protein import into nucleus, translocation
GO:0042307	Biological process	positive regulation of protein import into nucleus
GO:0051098	Biological process	regulation of binding
GO:0051365	Biological process	cellular response to potassium ion starvation
GO:0051601	Biological process	exocyst localization
GO:0070189	Biological process	kynurenine metabolic process
GO:0070601	Biological process	centromeric sister chromatid cohesion
GO:0070940	Biological process	dephosphorylation of RNA polymerase II C-terminal domain
GO:0071217	Biological process	cellular response to external biotic stimulus
GO:0080088	Biological process	spermidine hydroxycinnamate conjugate biosynthetic process
GO:1900182	Biological process	positive regulation of protein localization to nucleus
GO:0006098	Biological process	pentose-phosphate shunt
GO:0051156	Biological process	glucose 6-phosphate metabolic process
GO:0051983	Biological process	regulation of chromosome segregation
GO:0006275	Biological process	regulation of DNA replication
GO:0009404	Biological process	toxin metabolic process
GO:0009640	Biological process	photomorphogenesis
GO:0034605	Biological process	cellular response to heat
GO:0045926	Biological process	negative regulation of growth
GO:0051240	Biological process	positive regulation of multicellular organismal process
GO:0006108	Biological process	malate metabolic process
GO:0009855	Biological process	determination of bilateral symmetry
GO:0010114	Biological process	response to red light
GO:0033037	Biological process	polysaccharide localization
GO:0006650	Biological process	glycerophospholipid metabolic process
GO:0010039	Biological process	response to iron ion
GO:0048511	Biological process	rhythmic process
GO:0002697	Biological process	regulation of immune effector process
GO:0010413	Biological process	glucuronoxylan metabolic process
GO:0010417	Biological process	glucuronoxylan biosynthetic process
GO:0034620	Biological process	cellular response to unfolded protein
GO:0050688	Biological process	regulation of defense response to virus
GO:1900458	Biological process	negative regulation of brassinosteroid mediated signaling pathway
GO:0007584	Biological process	response to nutrient
GO:0071249	Biological process	cellular response to nitrate
GO:0090351	Biological process	seedling development
GO:0009110	Biological process	vitamin biosynthetic process
GO:0009143	Biological process	nucleoside triphosphate catabolic process
GO:0009643	Biological process	photosynthetic acclimation
GO:0010138	Biological process	pyrimidine ribonucleotide salvage
GO:0015865	Biological process	purine nucleotide transport
GO:0019673	Biological process	GDP-mannose metabolic process
GO:0032262	Biological process	pyrimidine nucleotide salvage
GO:0044206	Biological process	UMP salvage
GO:0070301	Biological process	cellular response to hydrogen peroxide
GO:0080148	Biological process	negative regulation of response to water deprivation
GO:1902289	Biological process	negative regulation of defense response to oomycetes
GO:1903313	Biological process	positive regulation of mRNA metabolic process
GO:0009861	Biological process	jasmonic acid and ethylene-dependent systemic resistance
GO:0062014	Biological process	negative regulation of small molecule metabolic process
GO:0046470	Biological process	phosphatidylcholine metabolic process
GO:0051223	Biological process	regulation of protein transport
GO:0070201	Biological process	regulation of establishment of protein localization
GO:0090087	Biological process	regulation of peptide transport
GO:0015695	Biological process	organic cation transport
GO:0080022	Biological process	primary root development
GO:1901068	Biological process	guanosine-containing compound metabolic process
GO:1902932	Biological process	positive regulation of alcohol biosynthetic process
GO:0045017	Biological process	glycerolipid biosynthetic process
GO:0033500	Biological process	carbohydrate homeostasis
GO:0046822	Biological process	regulation of nucleocytoplasmic transport
GO:1902182	Biological process	shoot apical meristem development
GO:0042127	Biological process	regulation of cell proliferation
GO:0009608	Biological process	response to symbiont
GO:0036293	Biological process	response to decreased oxygen levels
GO:0034614	Biological process	cellular response to reactive oxygen species
GO:0032504	Biological process	multicellular organism reproduction
GO:0000305	Biological process	response to oxygen radical
GO:0006569	Biological process	tryptophan catabolic process
GO:0009957	Biological process	epidermal cell fate specification
GO:0010070	Biological process	zygote asymmetric cell division
GO:0030100	Biological process	regulation of endocytosis
GO:0034052	Biological process	positive regulation of plant-type hypersensitive response
GO:0046218	Biological process	indolalkylamine catabolic process
GO:0060321	Biological process	acceptance of pollen
GO:0008360	Biological process	regulation of cell shape
GO:2000070	Biological process	regulation of response to water deprivation
GO:0010119	Biological process	regulation of stomatal movement
GO:0051567	Biological process	histone H3-K9 methylation
GO:0061647	Biological process	histone H3-K9 modification
GO:0071395	Biological process	cellular response to jasmonic acid stimulus
GO:0005978	Biological process	glycogen biosynthetic process
GO:0010115	Biological process	regulation of abscisic acid biosynthetic process
GO:0032885	Biological process	regulation of polysaccharide biosynthetic process
GO:0048354	Biological process	mucilage biosynthetic process involved in seed coat development
GO:0072583	Biological process	clathrin-dependent endocytosis
GO:0098661	Biological process	inorganic anion transmembrane transport
GO:1900034	Biological process	regulation of cellular response to heat
GO:0009218	Biological process	pyrimidine ribonucleotide metabolic process
GO:0009220	Biological process	pyrimidine ribonucleotide biosynthetic process
GO:0010337	Biological process	regulation of salicylic acid metabolic process
GO:0032273	Biological process	positive regulation of protein polymerization
GO:0046132	Biological process	pyrimidine ribonucleoside biosynthetic process
GO:0009787	Biological process	regulation of abscisic acid-activated signaling pathway
GO:1901419	Biological process	regulation of response to alcohol
GO:1905957	Biological process	regulation of cellular response to alcohol
GO:0009226	Biological process	nucleotide-sugar biosynthetic process
GO:0016108	Biological process	tetraterpenoid metabolic process
GO:0016116	Biological process	carotenoid metabolic process
GO:0009799	Biological process	specification of symmetry
GO:0008652	Biological process	cellular amino acid biosynthetic process
GO:0051094	Biological process	positive regulation of developmental process
GO:0009132	Biological process	nucleoside diphosphate metabolic process
GO:0046165	Biological process	alcohol biosynthetic process
GO:0009069	Biological process	serine family amino acid metabolic process
GO:0006767	Biological process	water-soluble vitamin metabolic process
GO:0002238	Biological process	response to molecule of fungal origin
GO:0042762	Biological process	regulation of sulfur metabolic process
GO:0009311	Biological process	oligosaccharide metabolic process
GO:0006273	Biological process	lagging strand elongation
GO:0015766	Biological process	disaccharide transport
GO:0015770	Biological process	sucrose transport
GO:0015772	Biological process	oligosaccharide transport
GO:0051051	Biological process	negative regulation of transport
GO:0070413	Biological process	trehalose metabolism in response to stress
GO:0006862	Biological process	nucleotide transport
GO:0031086	Biological process	nuclear-transcribed mRNA catabolic process, deadenylation-independent decay
GO:0031087	Biological process	deadenylation-independent decapping of nuclear-transcribed mRNA
GO:0071248	Biological process	cellular response to metal ion
GO:0009225	Biological process	nucleotide-sugar metabolic process
GO:0046785	Biological process	microtubule polymerization
GO:0006470	Biological process	protein dephosphorylation
GO:0045860	Biological process	positive regulation of protein kinase activity
GO:0010431	Biological process	seed maturation
GO:0031109	Biological process	microtubule polymerization or depolymerization
GO:0060969	Biological process	negative regulation of gene silencing
GO:0046890	Biological process	regulation of lipid biosynthetic process
GO:0009735	Biological process	response to cytokinin
GO:0006766	Biological process	vitamin metabolic process
GO:0009166	Biological process	nucleotide catabolic process
GO:0070482	Biological process	response to oxygen levels
GO:0008356	Biological process	asymmetric cell division
GO:0005977	Biological process	glycogen metabolic process
GO:0006112	Biological process	energy reserve metabolic process
GO:0010052	Biological process	guard cell differentiation
GO:0030031	Biological process	cell projection assembly
GO:0048639	Biological process	positive regulation of developmental growth
GO:0009838	Biological process	abscission
GO:0035384	Biological process	thioester biosynthetic process
GO:0071616	Biological process	acyl-CoA biosynthetic process
GO:0000290	Biological process	deadenylation-dependent decapping of nuclear-transcribed mRNA
GO:0008272	Biological process	sulfate transport
GO:0010389	Biological process	regulation of G2/M transition of mitotic cell cycle
GO:0015858	Biological process	nucleoside transport
GO:0031440	Biological process	regulation of mRNA 3'-end processing
GO:0031936	Biological process	negative regulation of chromatin silencing
GO:0080177	Biological process	plastoglobule organization
GO:1900363	Biological process	regulation of mRNA polyadenylation
GO:1904591	Biological process	positive regulation of protein import
GO:0001934	Biological process	positive regulation of protein phosphorylation
GO:0006749	Biological process	glutathione metabolic process
GO:0033674	Biological process	positive regulation of kinase activity
GO:0042455	Biological process	ribonucleoside biosynthetic process
GO:0016311	Biological process	dephosphorylation
GO:0090697	Biological process	post-embryonic plant organ morphogenesis
GO:0030041	Biological process	actin filament polymerization
GO:0030833	Biological process	regulation of actin filament polymerization
GO:0031349	Biological process	positive regulation of defense response
GO:0042325	Biological process	regulation of phosphorylation
GO:0001708	Biological process	cell fate specification
GO:0006323	Biological process	DNA packaging
GO:0010152	Biological process	pollen maturation
GO:0019628	Biological process	urate catabolic process
GO:0030245	Biological process	cellulose catabolic process
GO:0045930	Biological process	negative regulation of mitotic cell cycle
GO:0046415	Biological process	urate metabolic process
GO:0071428	Biological process	rRNA-containing ribonucleoprotein complex export from nucleus
GO:1900376	Biological process	regulation of secondary metabolite biosynthetic process
GO:2000069	Biological process	regulation of post-embryonic root development
GO:0009688	Biological process	abscisic acid biosynthetic process
GO:0015977	Biological process	carbon fixation
GO:0033157	Biological process	regulation of intracellular protein transport
GO:0043289	Biological process	apocarotenoid biosynthetic process
GO:0072348	Biological process	sulfur compound transport
GO:1902645	Biological process	tertiary alcohol biosynthetic process
GO:1905268	Biological process	negative regulation of chromatin organization
GO:0030030	Biological process	cell projection organization
GO:0031057	Biological process	negative regulation of histone modification
GO:0006534	Biological process	cysteine metabolic process
GO:0046134	Biological process	pyrimidine nucleoside biosynthetic process
GO:0051495	Biological process	positive regulation of cytoskeleton organization
GO:1902905	Biological process	positive regulation of supramolecular fiber organization
GO:0010564	Biological process	regulation of cell cycle process
GO:0006623	Biological process	protein targeting to vacuole
GO:0000187	Biological process	activation of MAPK activity
GO:0006915	Biological process	apoptotic process
GO:0010253	Biological process	UDP-rhamnose biosynthetic process
GO:0010430	Biological process	fatty acid omega-oxidation
GO:0010508	Biological process	positive regulation of autophagy
GO:0010964	Biological process	regulation of chromatin silencing by small RNA
GO:0015786	Biological process	UDP-glucose transmembrane transport
GO:0016094	Biological process	polyprenol biosynthetic process
GO:0031061	Biological process	negative regulation of histone methylation
GO:0031930	Biological process	mitochondria-nucleus signaling pathway
GO:0033478	Biological process	UDP-rhamnose metabolic process
GO:0035304	Biological process	regulation of protein dephosphorylation
GO:0042981	Biological process	regulation of apoptotic process
GO:0043066	Biological process	negative regulation of apoptotic process
GO:0043406	Biological process	positive regulation of MAP kinase activity
GO:0043410	Biological process	positive regulation of MAPK cascade
GO:0046136	Biological process	positive regulation of vitamin metabolic process
GO:0046622	Biological process	positive regulation of organ growth
GO:0050667	Biological process	homocysteine metabolic process
GO:0050982	Biological process	detection of mechanical stimulus
GO:0072387	Biological process	flavin adenine dinucleotide metabolic process
GO:0080086	Biological process	stamen filament development
GO:1901332	Biological process	negative regulation of lateral root development
GO:1901527	Biological process	abscisic acid-activated signaling pathway involved in stomatal movement
GO:1904965	Biological process	regulation of vitamin E biosynthetic process
GO:1904966	Biological process	positive regulation of vitamin E biosynthetic process
GO:0015995	Biological process	chlorophyll biosynthetic process
GO:0042327	Biological process	positive regulation of phosphorylation
GO:0000077	Biological process	DNA damage checkpoint
GO:0009554	Biological process	megasporogenesis
GO:0009660	Biological process	amyloplast organization
GO:0010158	Biological process	abaxial cell fate specification
GO:0035067	Biological process	negative regulation of histone acetylation
GO:0043097	Biological process	pyrimidine nucleoside salvage
GO:0046184	Biological process	aldehyde biosynthetic process
GO:0080142	Biological process	regulation of salicylic acid biosynthetic process
GO:1900036	Biological process	positive regulation of cellular response to heat
GO:1901031	Biological process	regulation of response to reactive oxygen species
GO:1901984	Biological process	negative regulation of protein acetylation
GO:2000757	Biological process	negative regulation of peptidyl-lysine acetylation
GO:0032879	Biological process	regulation of localization
GO:0048609	Biological process	multicellular organismal reproductive process
GO:1900056	Biological process	negative regulation of leaf senescence
GO:0007623	Biological process	circadian rhythm
GO:0009556	Biological process	microsporogenesis
GO:0051258	Biological process	protein polymerization
GO:0034293	Biological process	sexual sporulation
GO:0043934	Biological process	sporulation
GO:0048236	Biological process	plant-type sporogenesis
GO:0065001	Biological process	specification of axis polarity
GO:0006544	Biological process	glycine metabolic process
GO:0007006	Biological process	mitochondrial membrane organization
GO:0046834	Biological process	lipid phosphorylation
GO:0046854	Biological process	phosphatidylinositol phosphorylation
GO:0061013	Biological process	regulation of mRNA catabolic process
GO:0071577	Biological process	zinc ion transmembrane transport
GO:1902903	Biological process	regulation of supramolecular fiber organization
GO:0031401	Biological process	positive regulation of protein modification process
GO:0009163	Biological process	nucleoside biosynthetic process
GO:0010562	Biological process	positive regulation of phosphorus metabolic process
GO:0045937	Biological process	positive regulation of phosphate metabolic process
GO:0009687	Biological process	abscisic acid metabolic process
GO:0043288	Biological process	apocarotenoid metabolic process
GO:1902644	Biological process	tertiary alcohol metabolic process
GO:1905622	Biological process	negative regulation of leaf development
GO:0006739	Biological process	NADP metabolic process
GO:0006102	Biological process	isocitrate metabolic process
GO:0006646	Biological process	phosphatidylethanolamine biosynthetic process
GO:0009823	Biological process	cytokinin catabolic process
GO:0010332	Biological process	response to gamma radiation
GO:0010959	Biological process	regulation of metal ion transport
GO:0042306	Biological process	regulation of protein import into nucleus
GO:0042814	Biological process	monopolar cell growth
GO:0044209	Biological process	AMP salvage
GO:0046337	Biological process	phosphatidylethanolamine metabolic process
GO:1900180	Biological process	regulation of protein localization to nucleus
GO:1902115	Biological process	regulation of organelle assembly
GO:1902749	Biological process	regulation of cell cycle G2/M phase transition
GO:0080188	Biological process	RNA-directed DNA methylation
GO:2000030	Biological process	regulation of response to red or far red light
GO:0010118	Biological process	stomatal movement
GO:0009877	Biological process	nodulation
GO:0000098	Biological process	sulfur amino acid catabolic process
GO:0006272	Biological process	leading strand elongation
GO:0009970	Biological process	cellular response to sulfate starvation
GO:0010338	Biological process	leaf formation
GO:0019520	Biological process	aldonic acid metabolic process
GO:0034724	Biological process	DNA replication-independent nucleosome organization
GO:0042135	Biological process	neurotransmitter catabolic process
GO:0043486	Biological process	histone exchange
GO:0043687	Biological process	post-translational protein modification
GO:0046352	Biological process	disaccharide catabolic process
GO:0043085	Biological process	positive regulation of catalytic activity
GO:0007163	Biological process	establishment or maintenance of cell polarity
GO:0046620	Biological process	regulation of organ growth
GO:0051054	Biological process	positive regulation of DNA metabolic process
GO:0006541	Biological process	glutamine metabolic process
GO:0031050	Biological process	dsRNA processing
GO:0070918	Biological process	production of small RNA involved in gene silencing by RNA
GO:0045036	Biological process	protein targeting to chloroplast
GO:0072596	Biological process	establishment of protein localization to chloroplast
GO:0006334	Biological process	nucleosome assembly
GO:1990542	Biological process	mitochondrial transmembrane transport
GO:0006826	Biological process	iron ion transport
GO:0090696	Biological process	post-embryonic plant organ development
GO:1901292	Biological process	nucleoside phosphate catabolic process
GO:0001560	Biological process	regulation of cell growth by extracellular stimulus
GO:0006000	Biological process	fructose metabolic process
GO:0007094	Biological process	mitotic spindle assembly checkpoint
GO:0019428	Biological process	allantoin biosynthetic process
GO:0031577	Biological process	spindle checkpoint
GO:0033046	Biological process	negative regulation of sister chromatid segregation
GO:0033048	Biological process	negative regulation of mitotic sister chromatid segregation
GO:0034051	Biological process	negative regulation of plant-type hypersensitive response
GO:0045839	Biological process	negative regulation of mitotic nuclear division
GO:0045841	Biological process	negative regulation of mitotic metaphase/anaphase transition
GO:0051985	Biological process	negative regulation of chromosome segregation
GO:0071173	Biological process	spindle assembly checkpoint
GO:0071174	Biological process	mitotic spindle checkpoint
GO:1902100	Biological process	negative regulation of metaphase/anaphase transition of cell cycle
GO:1905819	Biological process	negative regulation of chromosome separation
GO:2000816	Biological process	negative regulation of mitotic sister chromatid separation
GO:0019220	Biological process	regulation of phosphate metabolic process
GO:0051174	Biological process	regulation of phosphorus metabolic process
GO:0016128	Biological process	phytosteroid metabolic process
GO:0071281	Biological process	cellular response to iron ion
GO:0010104	Biological process	regulation of ethylene-activated signaling pathway
GO:0070297	Biological process	regulation of phosphorelay signal transduction system
GO:0071103	Biological process	DNA conformation change
GO:0006305	Biological process	DNA alkylation
GO:0006306	Biological process	DNA methylation
GO:0008283	Biological process	cell proliferation
GO:0043174	Biological process	nucleoside salvage
GO:0048572	Biological process	short-day photoperiodism
GO:0048575	Biological process	short-day photoperiodism, flowering
GO:0051726	Biological process	regulation of cell cycle
GO:0002230	Biological process	positive regulation of defense response to virus by host
GO:0007000	Biological process	nucleolus organization
GO:0007019	Biological process	microtubule depolymerization
GO:0010271	Biological process	regulation of chlorophyll catabolic process
GO:0010366	Biological process	negative regulation of ethylene biosynthetic process
GO:0010603	Biological process	regulation of cytoplasmic mRNA processing body assembly
GO:0016093	Biological process	polyprenol metabolic process
GO:0016107	Biological process	sesquiterpenoid catabolic process
GO:0017006	Biological process	protein-tetrapyrrole linkage
GO:0030322	Biological process	stabilization of membrane potential
GO:0031336	Biological process	negative regulation of sulfur amino acid metabolic process
GO:0042868	Biological process	antisense RNA metabolic process
GO:0043132	Biological process	NAD transport
GO:0043266	Biological process	regulation of potassium ion transport
GO:0043290	Biological process	apocarotenoid catabolic process
GO:0043405	Biological process	regulation of MAP kinase activity
GO:0043408	Biological process	regulation of MAPK cascade
GO:0046345	Biological process	abscisic acid catabolic process
GO:0050691	Biological process	regulation of defense response to virus by host
GO:0051175	Biological process	negative regulation of sulfur metabolic process
GO:0051382	Biological process	kinetochore assembly
GO:0051383	Biological process	kinetochore organization
GO:0051503	Biological process	adenine nucleotide transport
GO:0080117	Biological process	secondary growth
GO:0080190	Biological process	lateral growth
GO:1900909	Biological process	negative regulation of olefin metabolic process
GO:1900912	Biological process	negative regulation of olefin biosynthetic process
GO:1901404	Biological process	regulation of tetrapyrrole catabolic process
GO:2001251	Biological process	negative regulation of chromosome organization
GO:0031497	Biological process	chromatin assembly
GO:0052545	Biological process	callose localization
GO:0022412	Biological process	cellular process involved in reproduction in multicellular organism
GO:0010204	Biological process	defense response signaling pathway, resistance gene-independent
GO:0006526	Biological process	arginine biosynthetic process
GO:0007135	Biological process	meiosis II
GO:0061983	Biological process	meiosis II cell cycle process
GO:0000086	Biological process	G2/M transition of mitotic cell cycle
GO:0006166	Biological process	purine ribonucleoside salvage
GO:0006349	Biological process	regulation of gene expression by genetic imprinting
GO:0006491	Biological process	N-glycan processing
GO:0009609	Biological process	response to symbiotic bacterium
GO:0010962	Biological process	regulation of glucan biosynthetic process
GO:0015743	Biological process	malate transport
GO:0042436	Biological process	indole-containing compound catabolic process
GO:0048587	Biological process	regulation of short-day photoperiodism, flowering
GO:0070676	Biological process	intralumenal vesicle formation
GO:0071514	Biological process	genetic imprinting
GO:0040011	Biological process	locomotion
GO:0051783	Biological process	regulation of nuclear division
GO:0009690	Biological process	cytokinin metabolic process
GO:1901661	Biological process	quinone metabolic process
GO:1901663	Biological process	quinone biosynthetic process
GO:0009142	Biological process	nucleoside triphosphate biosynthetic process
GO:0000209	Biological process	protein polyubiquitination
GO:0032386	Biological process	regulation of intracellular transport
GO:0048582	Biological process	positive regulation of post-embryonic development
GO:0090626	Biological process	plant epidermis morphogenesis
GO:0009095	Biological process	aromatic amino acid family biosynthetic process, prephenate pathway
GO:0051026	Biological process	chiasma assembly
GO:0071265	Biological process	L-methionine biosynthetic process
GO:1902930	Biological process	regulation of alcohol biosynthetic process
GO:0000280	Biological process	nuclear division
GO:0033014	Biological process	tetrapyrrole biosynthetic process
GO:0048443	Biological process	stamen development
GO:0048466	Biological process	androecium development
GO:0009959	Biological process	negative gravitropism
GO:0010363	Biological process	regulation of plant-type hypersensitive response
GO:0009943	Biological process	adaxial/abaxial axis specification
GO:0009944	Biological process	polarity specification of adaxial/abaxial axis
GO:0010375	Biological process	stomatal complex patterning
GO:0043971	Biological process	histone H3-K18 acetylation
GO:0043972	Biological process	histone H3-K23 acetylation
GO:0044154	Biological process	histone H3-K14 acetylation
GO:0080051	Biological process	cutin transport
GO:1900490	Biological process	positive regulation of hydroxymethylglutaryl-CoA reductase (NADPH) activity
GO:2001215	Biological process	regulation of hydroxymethylglutaryl-CoA reductase (NADPH) activity
GO:0006842	Biological process	tricarboxylic acid transport
GO:0010113	Biological process	negative regulation of systemic acquired resistance
GO:0015713	Biological process	phosphoglycerate transmembrane transport
GO:0030259	Biological process	lipid glycosylation
GO:0031054	Biological process	pre-miRNA processing
GO:0031297	Biological process	replication fork processing
GO:0033239	Biological process	negative regulation of cellular amine metabolic process
GO:0045168	Biological process	cell-cell signaling involved in cell fate commitment
GO:0045763	Biological process	negative regulation of cellular amino acid metabolic process
GO:0046246	Biological process	terpene biosynthetic process
GO:0051348	Biological process	negative regulation of transferase activity
GO:0051415	Biological process	microtubule nucleation by interphase microtubule organizing center
GO:0051418	Biological process	microtubule nucleation by microtubule organizing center
GO:0071329	Biological process	cellular response to sucrose stimulus
GO:0034404	Biological process	nucleobase-containing small molecule biosynthetic process
GO:0006779	Biological process	porphyrin-containing compound biosynthetic process
GO:0010026	Biological process	trichome differentiation
GO:0031098	Biological process	stress-activated protein kinase signaling cascade
GO:0042631	Biological process	cellular response to water deprivation
GO:0042753	Biological process	positive regulation of circadian rhythm
GO:0000819	Biological process	sister chromatid segregation
GO:0019216	Biological process	regulation of lipid metabolic process
GO:0000060	Biological process	protein import into nucleus, translocation
GO:0006771	Biological process	riboflavin metabolic process
GO:0009231	Biological process	riboflavin biosynthetic process
GO:0030308	Biological process	negative regulation of cell growth
GO:0035967	Biological process	cellular response to topologically incorrect protein
GO:0042548	Biological process	regulation of photosynthesis, light reaction
GO:0042727	Biological process	flavin-containing compound biosynthetic process
GO:0008154	Biological process	actin polymerization or depolymerization
GO:0031331	Biological process	positive regulation of cellular catabolic process
GO:0045454	Biological process	cell redox homeostasis
GO:0016132	Biological process	brassinosteroid biosynthetic process
GO:0030150	Biological process	protein import into mitochondrial matrix
GO:0072598	Biological process	protein localization to chloroplast
GO:0032271	Biological process	regulation of protein polymerization
GO:0009768	Biological process	photosynthesis, light harvesting in photosystem I
GO:0009942	Biological process	longitudinal axis specification
GO:0009953	Biological process	dorsal/ventral pattern formation
GO:0035337	Biological process	fatty-acyl-CoA metabolic process
GO:0035510	Biological process	DNA dealkylation
GO:0045144	Biological process	meiotic sister chromatid segregation
GO:0048262	Biological process	determination of dorsal/ventral asymmetry
GO:0051177	Biological process	meiotic sister chromatid cohesion
GO:0051182	Biological process	coenzyme transport
GO:0052033	Biological process	pathogen-associated molecular pattern dependent induction by symbiont of host innate immune response
GO:0052166	Biological process	positive regulation by symbiont of host innate immune response
GO:0052167	Biological process	modulation by symbiont of host innate immune response
GO:0052169	Biological process	pathogen-associated molecular pattern dependent modulation by symbiont of host innate immune response
GO:0052257	Biological process	pathogen-associated molecular pattern dependent induction by organism of innate immune response of other organism involved in symbiotic interaction
GO:0052305	Biological process	positive regulation by organism of innate immune response in other organism involved in symbiotic interaction
GO:0052306	Biological process	modulation by organism of innate immune response in other organism involved in symbiotic interaction
GO:0052308	Biological process	pathogen-associated molecular pattern dependent modulation by organism of innate immune response in other organism involved in symbiotic interaction
GO:0052509	Biological process	positive regulation by symbiont of host defense response
GO:0052510	Biological process	positive regulation by organism of defense response of other organism involved in symbiotic interaction
GO:0080111	Biological process	DNA demethylation
GO:0043094	Biological process	cellular metabolic compound salvage
GO:0051193	Biological process	regulation of cofactor metabolic process
GO:0005985	Biological process	sucrose metabolic process
GO:0032880	Biological process	regulation of protein localization
GO:0006571	Biological process	tyrosine biosynthetic process
GO:0009092	Biological process	homoserine metabolic process
GO:0010235	Biological process	guard mother cell cytokinesis
GO:0010731	Biological process	protein glutathionylation
GO:0016444	Biological process	somatic cell DNA recombination
GO:0030643	Biological process	cellular phosphate ion homeostasis
GO:0035303	Biological process	regulation of dephosphorylation
GO:0046355	Biological process	mannan catabolic process
GO:0072501	Biological process	cellular divalent inorganic anion homeostasis
GO:0072502	Biological process	cellular trivalent inorganic anion homeostasis
GO:1903533	Biological process	regulation of protein targeting
GO:0000045	Biological process	autophagosome assembly
GO:0031348	Biological process	negative regulation of defense response
GO:0051194	Biological process	positive regulation of cofactor metabolic process
GO:0009112	Biological process	nucleobase metabolic process
GO:0051304	Biological process	chromosome separation
GO:1903827	Biological process	regulation of cellular protein localization
GO:0065009	Biological process	regulation of molecular function
GO:0071462	Biological process	cellular response to water stimulus
GO:0090698	Biological process	post-embryonic plant morphogenesis
GO:0006097	Biological process	glyoxylate cycle
GO:0009094	Biological process	L-phenylalanine biosynthetic process
GO:0046487	Biological process	glyoxylate metabolic process
GO:1902223	Biological process	erythrose 4-phosphate/phosphoenolpyruvate family amino acid biosynthetic process
GO:0071322	Biological process	cellular response to carbohydrate stimulus
GO:0009933	Biological process	meristem structural organization
GO:0009695	Biological process	jasmonic acid biosynthetic process
GO:0030307	Biological process	positive regulation of cell growth
GO:0031334	Biological process	positive regulation of protein complex assembly
GO:0046653	Biological process	tetrahydrofolate metabolic process
GO:0006261	Biological process	DNA-dependent DNA replication
GO:0006575	Biological process	cellular modified amino acid metabolic process
GO:0000393	Biological process	spliceosomal conformational changes to generate catalytic conformation
GO:0006448	Biological process	regulation of translational elongation
GO:0009920	Biological process	cell plate formation involved in plant-type cell wall biogenesis
GO:0030010	Biological process	establishment of cell polarity
GO:0033356	Biological process	UDP-L-arabinose metabolic process
GO:0043271	Biological process	negative regulation of ion transport
GO:0045737	Biological process	positive regulation of cyclin-dependent protein serine/threonine kinase activity
GO:0046500	Biological process	S-adenosylmethionine metabolic process
GO:1904031	Biological process	positive regulation of cyclin-dependent protein kinase activity
GO:0009756	Biological process	carbohydrate mediated signaling
GO:0010182	Biological process	sugar mediated signaling pathway
GO:0009639	Biological process	response to red or far red light
GO:0031400	Biological process	negative regulation of protein modification process
GO:0006271	Biological process	DNA strand elongation involved in DNA replication
GO:0009310	Biological process	amine catabolic process
GO:0019509	Biological process	L-methionine salvage from methylthioadenosine
GO:0022616	Biological process	DNA strand elongation
GO:0031627	Biological process	telomeric loop formation
GO:0042402	Biological process	cellular biogenic amine catabolic process
GO:0046654	Biological process	tetrahydrofolate biosynthetic process
GO:0052031	Biological process	modulation by symbiont of host defense response
GO:0052173	Biological process	response to defenses of other organism involved in symbiotic interaction
GO:0052200	Biological process	response to host defenses
GO:0052255	Biological process	modulation by organism of defense response of other organism involved in symbiotic interaction
GO:0052552	Biological process	modulation by organism of immune response of other organism involved in symbiotic interaction
GO:0052553	Biological process	modulation by symbiont of host immune response
GO:0052555	Biological process	positive regulation by organism of immune response of other organism involved in symbiotic interaction
GO:0052556	Biological process	positive regulation by symbiont of host immune response
GO:0052564	Biological process	response to immune response of other organism involved in symbiotic interaction
GO:0052572	Biological process	response to host immune response
GO:0075136	Biological process	response to host
GO:0006986	Biological process	response to unfolded protein
GO:0010187	Biological process	negative regulation of seed germination
GO:0046474	Biological process	glycerophospholipid biosynthetic process
GO:0009084	Biological process	glutamine family amino acid biosynthetic process
GO:0023014	Biological process	signal transduction by protein phosphorylation
GO:0015672	Biological process	monovalent inorganic cation transport
GO:0046903	Biological process	secretion
GO:0010105	Biological process	negative regulation of ethylene-activated signaling pathway
GO:0070298	Biological process	negative regulation of phosphorelay signal transduction system
GO:0071804	Biological process	cellular potassium ion transport
GO:0071805	Biological process	potassium ion transmembrane transport
GO:0009742	Biological process	brassinosteroid mediated signaling pathway
GO:0043401	Biological process	steroid hormone mediated signaling pathway
GO:0048545	Biological process	response to steroid hormone
GO:0071383	Biological process	cellular response to steroid hormone stimulus
GO:0000303	Biological process	response to superoxide
GO:0006432	Biological process	phenylalanyl-tRNA aminoacylation
GO:0006471	Biological process	protein ADP-ribosylation
GO:0007187	Biological process	G protein-coupled receptor signaling pathway, coupled to cyclic nucleotide second messenger
[truncated: 1,819 more rows]
