# Supplementary material for: Exogenous Calcium Alleviates Oxidative Stress Caused by Salt Stress in Peanut Seedling Roots by Regulating the Antioxidant Enzyme System and Flavonoid Biosynthesis
Source: Antioxidants (Basel). 2024 Feb 14;13(2):233. doi: 10.3390/antiox13020233 (PMC10886236; doi:10.3390/antiox13020233)
Supplement: Supplementary file 1 [file antioxidants-13-00233-s001.zip › Table S2.xlsx]

## Sheet: Sheet1
class	pathway_ID	pathway_name	DEG_number	bg_number	ratio	per	Pvalue	Qvalue
Metabolism	ko01110	Biosynthesis of secondary metabolites	809	5214	0.155	32.205	2.52e-17	3.4e-15
Metabolism	ko00940	Phenylpropanoid biosynthesis	119	487	0.244	4.737	2.91e-14	1.97e-12
Metabolism	ko00040	Pentose and glucuronate interconversions	117	533	0.22	4.658	8.83e-11	3.98e-09
Metabolism	ko01100	Metabolic pathways	1243	9067	0.137	49.482	8.45e-10	2.85e-08
Environmental Information Processing	ko04016	MAPK signaling pathway - plant	222	1260	0.176	8.838	3.52e-09	9.51e-08
Metabolism	ko00943	Isoflavonoid biosynthesis	50	204	0.245	1.99	7.61e-07	1.71e-05
Metabolism	ko00950	Isoquinoline alkaloid biosynthesis	37	145	0.255	1.473	7.46e-06	0.000144
Metabolism	ko00350	Tyrosine metabolism	42	187	0.225	1.672	5.31e-05	0.000896
Metabolism	ko00999	Biosynthesis of various plant secondary metabolites	51	254	0.201	2.03	0.00019595	0.00294
Metabolism	ko00460	Cyanoamino acid metabolism	43	213	0.202	1.712	0.000529093	0.00714
Metabolism	ko00941	Flavonoid biosynthesis	39	193	0.202	1.553	0.000917207	0.0113
Metabolism	ko00944	Flavone and flavonol biosynthesis	13	45	0.289	0.518	0.00206433	0.0232
Metabolism	ko00052	Galactose metabolism	66	385	0.171	2.627	0.00237314	0.0246
Metabolism	ko00520	Amino sugar and nucleotide sugar metabolism	76	460	0.165	3.025	0.00321257	0.0291
Metabolism	ko00902	Monoterpenoid biosynthesis	18	75	0.24	0.717	0.00323129	0.0291
Metabolism	ko00590	Arachidonic acid metabolism	22	100	0.22	0.876	0.00387592	0.032
Environmental Information Processing	ko02010	ABC transporters	49	276	0.178	1.951	0.00403466	0.032
Metabolism	ko00100	Steroid biosynthesis	20	89	0.225	0.796	0.0044509	0.0334
Metabolism	ko00900	Terpenoid backbone biosynthesis	30	152	0.197	1.194	0.00480821	0.0342
Metabolism	ko00480	Glutathione metabolism	48	275	0.175	1.911	0.00610508	0.0412
Metabolism	ko00960	Tropane, piperidine and pyridine alkaloid biosynthesis	31	163	0.19	1.234	0.00734748	0.0472
Organismal Systems	ko04626	Plant-pathogen interaction	282	2035	0.139	11.226	0.00789891	0.0485
Metabolism	ko00500	Starch and sucrose metabolism	145	1027	0.141	5.772	0.0284568	0.167
Metabolism	ko00565	Ether lipid metabolism	21	114	0.184	0.836	0.0332417	0.183
Metabolism	ko00531	Glycosaminoglycan degradation	27	155	0.174	1.075	0.0338572	0.183
Metabolism	ko00904	Diterpenoid biosynthesis	24	136	0.176	0.955	0.0380814	0.191
Metabolism	ko00910	Nitrogen metabolism	17	89	0.191	0.677	0.0381991	0.191
Environmental Information Processing	ko04075	Plant hormone signal transduction	190	1388	0.137	7.564	0.0395788	0.191
Metabolism	ko00073	Cutin, suberine and wax biosynthesis	24	140	0.171	0.955	0.050946	0.234
Metabolism	ko00511	Other glycan degradation	34	211	0.161	1.354	0.0519788	0.234
Metabolism	ko00380	Tryptophan metabolism	43	281	0.153	1.712	0.0655224	0.285
Metabolism	ko00360	Phenylalanine metabolism	27	166	0.163	1.075	0.0696429	0.293
Metabolism	ko00604	Glycosphingolipid biosynthesis - ganglio series	21	124	0.169	0.836	0.0716801	0.293
Metabolism	ko00591	Linoleic acid metabolism	23	140	0.164	0.916	0.0810918	0.315
Metabolism	ko00730	Thiamine metabolism	12	64	0.188	0.478	0.0823044	0.315
Metabolism	ko00564	Glycerophospholipid metabolism	56	384	0.146	2.229	0.0840303	0.315
Metabolism	ko00780	Biotin metabolism	10	52	0.192	0.398	0.0933001	0.34
Metabolism	ko00945	Stilbenoid, diarylheptanoid and gingerol biosynthesis	16	94	0.17	0.637	0.101946	0.362
Metabolism	ko00561	Glycerolipid metabolism	46	316	0.146	1.831	0.110549	0.377
Metabolism	ko00232	Caffeine metabolism	3	10	0.3	0.119	0.111832	0.377
Metabolism	ko00053	Ascorbate and aldarate metabolism	34	229	0.148	1.354	0.125491	0.413
Metabolism	ko00130	Ubiquinone and other terpenoid-quinone biosynthesis	35	240	0.146	1.393	0.144724	0.465
Metabolism	ko00592	alpha-Linolenic acid metabolism	23	152	0.151	0.916	0.157235	0.494
Metabolism	ko00061	Fatty acid biosynthesis	23	153	0.15	0.916	0.16496	0.506
Metabolism	ko00010	Glycolysis / Gluconeogenesis	59	430	0.137	2.349	0.1747	0.524
Organismal Systems	ko04712	Circadian rhythm - plant	43	307	0.14	1.712	0.17902	0.525
Metabolism	ko00402	Benzoxazinoid biosynthesis	10	61	0.164	0.398	0.201236	0.578
Metabolism	ko00270	Cysteine and methionine metabolism	43	314	0.137	1.712	0.221772	0.624
Metabolism	ko00966	Glucosinolate biosynthesis	8	49	0.163	0.318	0.239694	0.66
Metabolism	ko00603	Glycosphingolipid biosynthesis - globo and isoglobo series	6	36	0.167	0.239	0.268288	0.724
Metabolism	ko00908	Zeatin biosynthesis	12	83	0.145	0.478	0.305429	0.808
Cellular Processes	ko04146	Peroxisome	37	280	0.132	1.473	0.317561	0.824
Metabolism	ko00901	Indole alkaloid biosynthesis	7	46	0.152	0.279	0.323306	0.824
Metabolism	ko00250	Alanine, aspartate and glutamate metabolism	20	149	0.134	0.796	0.352455	0.881
Metabolism	ko00062	Fatty acid elongation	14	104	0.135	0.557	0.384035	0.934
Metabolism	ko00030	Pentose phosphate pathway	25	192	0.13	0.995	0.387582	0.934
Genetic Information Processing	ko04122	Sulfur relay system	5	34	0.147	0.199	0.39818	0.943
Metabolism	ko00290	Valine, leucine and isoleucine biosynthesis	7	50	0.14	0.279	0.406311	0.946
Metabolism	ko00600	Sphingolipid metabolism	25	195	0.128	0.995	0.419093	0.955
Metabolism	ko00620	Pyruvate metabolism	45	358	0.126	1.791	0.427392	0.955
Metabolism	ko00071	Fatty acid degradation	23	180	0.128	0.916	0.431645	0.955
Metabolism	ko00430	Taurine and hypotaurine metabolism	5	37	0.135	0.199	0.473148	0.999
Metabolism	ko00515	Mannose type O-glycan biosynthesis	1	5	0.2	0.04	0.476784	0.999
Metabolism	ko00909	Sesquiterpenoid and triterpenoid biosynthesis	17	136	0.125	0.677	0.489326	0.999
Metabolism	ko00906	Carotenoid biosynthesis	17	137	0.124	0.677	0.502079	0.999
Metabolism	ko00440	Phosphonate and phosphinate metabolism	4	30	0.133	0.159	0.503198	0.999
Metabolism	ko00903	Limonene and pinene degradation	4	30	0.133	0.159	0.503198	0.999
Metabolism	ko00942	Anthocyanin biosynthesis	4	30	0.133	0.159	0.503198	0.999
Metabolism	ko00660	C5-Branched dibasic acid metabolism	3	22	0.136	0.119	0.510573	0.999
Metabolism	ko00640	Propanoate metabolism	14	115	0.122	0.557	0.539648	1
Metabolism	ko00254	Aflatoxin biosynthesis	1	6	0.167	0.04	0.540369	1
Metabolism	ko01212	Fatty acid metabolism	26	216	0.12	1.035	0.551798	1
Metabolism	ko00514	Other types of O-glycan biosynthesis	9	74	0.122	0.358	0.551914	1
Cellular Processes	ko04145	Phagosome	28	235	0.119	1.115	0.57431	1
Metabolism	ko00905	Brassinosteroid biosynthesis	4	33	0.121	0.159	0.581344	1
Metabolism	ko00340	Histidine metabolism	11	93	0.118	0.438	0.58552	1
Metabolism	ko00650	Butanoate metabolism	8	68	0.118	0.318	0.594353	1
Genetic Information Processing	ko03050	Proteasome	31	264	0.117	1.234	0.609195	1
Metabolism	ko00563	Glycosylphosphatidylinositol (GPI)-anchor biosynthesis	13	112	0.116	0.518	0.613295	1
Metabolism	ko00280	Valine, leucine and isoleucine degradation	23	197	0.117	0.916	0.613947	1
Metabolism	ko00410	beta-Alanine metabolism	16	144	0.111	0.637	0.686747	1
Metabolism	ko00710	Carbon fixation in photosynthetic organisms	20	181	0.11	0.796	0.708737	1
Metabolism	ko00790	Folate biosynthesis	9	88	0.102	0.358	0.756861	1
Metabolism	ko01200	Carbon metabolism	85	750	0.113	3.384	0.772909	1
Metabolism	ko00195	Photosynthesis	14	138	0.101	0.557	0.801127	1
Metabolism	ko00330	Arginine and proline metabolism	21	203	0.103	0.836	0.814453	1
Metabolism	ko00601	Glycosphingolipid biosynthesis - lacto and neolacto series	1	15	0.067	0.04	0.856839	1
Metabolism	ko00051	Fructose and mannose metabolism	25	247	0.101	0.995	0.861028	1
Genetic Information Processing	ko03060	Protein export	16	166	0.096	0.637	0.869299	1
Metabolism	ko00240	Pyrimidine metabolism	25	249	0.1	0.995	0.870891	1
Genetic Information Processing	ko04130	SNARE interactions in vesicular transport	10	110	0.091	0.398	0.873891	1
Metabolism	ko00630	Glyoxylate and dicarboxylate metabolism	22	225	0.098	0.876	0.887062	1
Metabolism	ko00230	Purine metabolism	38	374	0.102	1.513	0.900063	1
Metabolism	ko00310	Lysine degradation	13	145	0.09	0.518	0.908774	1
Metabolism	ko00760	Nicotinate and nicotinamide metabolism	6	78	0.077	0.239	0.924256	1
Metabolism	ko00196	Photosynthesis - antenna proteins	2	34	0.059	0.08	0.93045	1
Metabolism	ko00562	Inositol phosphate metabolism	30	314	0.096	1.194	0.937848	1
Metabolism	ko00670	One carbon pool by folate	4	63	0.063	0.159	0.956779	1
Metabolism	ko00750	Vitamin B6 metabolism	2	39	0.051	0.08	0.959233	1
Metabolism	ko01040	Biosynthesis of unsaturated fatty acids	4	65	0.062	0.159	0.963767	1
Genetic Information Processing	ko03450	Non-homologous end-joining	1	26	0.038	0.04	0.965617	1
Genetic Information Processing	ko04120	Ubiquitin mediated proteolysis	45	472	0.095	1.791	0.969738	1
Metabolism	ko00260	Glycine, serine and threonine metabolism	18	216	0.083	0.717	0.971586	1
Metabolism	ko00920	Sulfur metabolism	6	94	0.064	0.239	0.977844	1
Genetic Information Processing	ko00970	Aminoacyl-tRNA biosynthesis	19	232	0.082	0.756	0.979521	1
Genetic Information Processing	ko04141	Protein processing in endoplasmic reticulum	76	768	0.099	3.025	0.979763	1
Metabolism	ko00740	Riboflavin metabolism	5	85	0.059	0.199	0.982273	1
Metabolism	ko00450	Selenocompound metabolism	2	47	0.043	0.08	0.983066	1
Genetic Information Processing	ko03440	Homologous recombination	29	335	0.087	1.154	0.983662	1
Metabolism	ko00770	Pantothenate and CoA biosynthesis	9	133	0.068	0.358	0.985328	1
Cellular Processes	ko04136	Autophagy - other	8	122	0.066	0.318	0.985459	1
Metabolism	ko00965	Betalain biosynthesis	3	63	0.048	0.119	0.986656	1
Cellular Processes	ko04144	Endocytosis	74	765	0.097	2.946	0.987749	1
Metabolism	ko00220	Arginine biosynthesis	5	91	0.055	0.199	0.989557	1
Genetic Information Processing	ko03022	Basal transcription factors	10	153	0.065	0.398	0.992379	1
Genetic Information Processing	ko03430	Mismatch repair	17	234	0.073	0.677	0.994628	1
Genetic Information Processing	ko03030	DNA replication	20	276	0.072	0.796	0.997191	1
Metabolism	ko01210	2-Oxocarboxylic acid metabolism	12	190	0.063	0.478	0.997402	1
Environmental Information Processing	ko04070	Phosphatidylinositol signaling system	23	310	0.074	0.916	0.997588	1
Metabolism	ko00860	Porphyrin metabolism	7	135	0.052	0.279	0.998111	1
Metabolism	ko00020	Citrate cycle (TCA cycle)	9	163	0.055	0.358	0.998607	1
Genetic Information Processing	ko03020	RNA polymerase	9	164	0.055	0.358	0.998718	1
Genetic Information Processing	ko03040	Spliceosome	72	813	0.089	2.866	0.999046	1
Metabolism	ko00400	Phenylalanine, tyrosine and tryptophan biosynthesis	8	159	0.05	0.318	0.999314	1
Metabolism	ko00513	Various types of N-glycan biosynthesis	6	135	0.044	0.239	0.999417	1
Metabolism	ko01230	Biosynthesis of amino acids	57	711	0.08	2.269	0.999881	1
Genetic Information Processing	ko03410	Base excision repair	5	150	0.033	0.199	0.999968	1
Genetic Information Processing	ko03008	Ribosome biogenesis in eukaryotes	20	346	0.058	0.796	0.999979	1
Genetic Information Processing	ko03013	Nucleocytoplasmic transport	22	374	0.059	0.876	0.999985	1
Genetic Information Processing	ko03420	Nucleotide excision repair	13	286	0.045	0.518	0.999997	1
Genetic Information Processing	ko03018	RNA degradation	22	403	0.055	0.876	0.999999	1
Metabolism	ko00510	N-Glycan biosynthesis	3	173	0.017	0.119	1	1
Metabolism	ko00190	Oxidative phosphorylation	12	332	0.036	0.478	1	1
Genetic Information Processing	ko03010	Ribosome	14	822	0.017	0.557	1	1
Genetic Information Processing	ko03015	mRNA surveillance pathway	13	425	0.031	0.518	1	1
