# Supplementary material for: Exogenous Calcium Alleviates Oxidative Stress Caused by Salt Stress in Peanut Seedling Roots by Regulating the Antioxidant Enzyme System and Flavonoid Biosynthesis
Source: Antioxidants (Basel). 2024 Feb 14;13(2):233. doi: 10.3390/antiox13020233 (PMC10886236; doi:10.3390/antiox13020233)
Supplement: Supplementary file 1 [file antioxidants-13-00233-s001.zip › Table S3.xlsx]

## Sheet: Sheet1
Compounds	Formula	Molecular Weight	CK	Na	Ca	Na_Ca	CPD_ID	Ion mode	Ionization model
2'-Hydroxygenistein	C15H10O6	286.048	0	0.00254258	0	0	C12134	Negative	[M-H]-
Isosakuranetin	C16H14O5	286.084	0	0.00567832	0	0	C05334	Negative	[M-H]-
Prunetin	C16H12O5	284.068	0.0115361	1.0196	0.0161002	0.0399256	C10521	Negative	[M-H]-
Genistein	C15H10O5	270.053	0	0.0239886	0	0	C06563	Negative	[M-H]-
Apigenin	C15H10O5	270.053	0	0.00734781	0	0	C01477	Negative	[M-H]-
Vitexin	C21H20O10	432.106	0.00602907	0.00806299	0.00354278	0.00536022	C01460	Negative	[M-H]-
Chrysin	C15H10O4	254.058	0.0134538	0.047313	0.00399918	0.00527653	C10028	Negative	[M-H]-
Pinocembrin	C15H12O4	256.074	0.0312625	0.200584	0.00691389	0.0102071	C09827	Negative	[M-H]-
Isoliquiritigenin	C15H12O4	256.074	0.00123523	0.655013	0.00820686	0.0122076	C08650	Negative	[M-H]-
Glycitin	C22H22O10	446.121	0	0.258339	0	0	C16195	Negative	[M-H]-
Daidzein	C15H10O4	254.058	0	0.288812	0	0	C10208	Negative	[M-H]-
Daidzin	C21H20O9	416.111	0.0272337	0.121813	0.0189243	0.0806858	C10216	Negative	[M-H]-
Formononetin	C16H12O4	268.074	0.0372444	2.26682	0.0774539	0.123676	C00858	Negative	[M-H]-
Calycosin	C16H12O5	284.068	0.000842078	0.0792923	0.00419008	0.00799329	C01562	Negative	[M-H]-
Naringenin chalcone	C15H12O5	272.068	0.00657334	0.187183	0.00420278	0.00378285	C06561	Negative	[M-H]-
(-)-Epigallocatechin	C15H14O7	306.074	0.0650265	0.0969564	0.0585188	0.0468683	C12136	Positive	[M+H]+
Eriodictyol	C15H12O6	288.063	0	0.0708751	0	0	C05631	Negative	[M-H]-
Dihydromyricetin	C15H12O8	320.053	0.00455838	0	0.0214517	0.0179437	C02906	Negative	[M-H]-
Dihydrokaempferol	C15H12O6	288.063	0	0.606809	0	0	C00974	Negative	[M-H]-
(-)-Epicatechin	C15H14O6	290.079	0.0196511	0.0325941	0.0161207	0.0262547	C09727	Negative	[M-H]-
Quercitrin	C21H20O11	448.101	0.019403	0.0202952	0.0347206	0.0170243	C01750	Negative	[M-H]-
Rutin	C27H30O16	610.153	0.0972412	0.13024	0.109084	0.106281	C05625	Negative	[M-H]-
Hyperoside	C21H20O12	464.095	34.4539	16.7926	12.0165	13.8608	-	Positive	[M+H]+
(-)-Catechin gallate	C22H18O10	442.09	0	0.146385	0	0.0516821	-	Negative	[M-H]-
3,4'-Dihydroxyflavone	C15H10O4	254.05791	0	0.00158332	0	0	-	Negative	[M-H]-
7,4'-Dihydroxyflavone	C15H10O4	254.05791	0	0.0362234	0	0	C12123	Negative	[M-H]-
Apigenin-7-glucuronide	C21H18O11	446.084915	0	0.114914	0.0671572	0.0202092	-	Negative	[M-H]-
Avicularin	C20H18O11	434.084915	0	0.00494671	0.0131268	0	-	Negative	[M-H]-
Chrysosplenetin	C19H18O8	374.10017	0.00281368	0.0011897	0	0	C10030	Negative	[M-H]-
Genistin	C21H20O10	432.10565	0	0.200282	0	0	-	Negative	[M-H]-
Homoplantaginin	C22H22O11	462.116215	0.0586391	0.00810218	0.0226732	0.0610943	C17762	Negative	[M-H]-
Hydroxysafflor yellow A	C27H32O16	612.16904	0.0570494	0.131996	0.0243545	0.0568336	-	Negative	[M-H]-
Isobavachalcone	C20H20O4	324.13616	0	0.00113147	0	0	C08648	Negative	[M-H]-
Isomangiferin	C19H18O11	422.084915	0	0.00662683	0	0	C16979	Negative	[M-H]-
Isoorientin	C21H20O11	448.100565	0	0.00563051	0	0	C01821	Negative	[M-H]-
Isosakuranin	C22H24O10	448.13695	0	0.0175234	0	0	-	Negative	[M-H]-
Jaceosidin	C17H14O7	330.073955	0.00231306	0.00609493	0.00251075	0.0013871	-	Negative	[M-H]-
Liquiritigenin	C15H12O4	256.07356	0.00940926	0.735407	0.0082206	0.0172709	C09762	Negative	[M-H]-
Liquiritin	C21H22O9	418.126385	0.0156896	0.0866271	0.0137827	0.0213166	C16989	Negative	[M-H]-
Luteolin	C15H10O6	286.04774	0.0144788	0	0.0151061	0.0156499	C01514	Negative	[M-H]-
Naringenin-7-glucoside	C21H22O10	434.1213	0	0.122721	0.0158749	0	-	Negative	[M-H]-
Spiraeoside	C21H20O12	464.09548	0.0206622	0	0.0141727	0.0193529	-	Negative	[M-H]-
Tectorigenin	C16H12O6	300.06339	0	0.0191641	0.00849591	0	C10534	Negative	[M-H]-
Tiliroside	C30H26O13	594.137345	0.0022026	0.00824847	0.0006298	0	-	Negative	[M-H]-
Trimethylapigenin	C18H16O5	312.099775	0	0.056942	0	0	-	Positive	[M+H]+
Troxerutin	C33H42O19	742.232035	0	0.905215	0.288421	0.18066	-	Positive	[M+H]+
