# Supplementary material for: Exogenous Calcium Alleviates Oxidative Stress Caused by Salt Stress in Peanut Seedling Roots by Regulating the Antioxidant Enzyme System and Flavonoid Biosynthesis
Source: Antioxidants (Basel). 2024 Feb 14;13(2):233. doi: 10.3390/antiox13020233 (PMC10886236; doi:10.3390/antiox13020233)
Supplement: Supplementary file 1 [file antioxidants-13-00233-s001.zip › Table S4.xlsx]

## Sheet: Sheet1
Table S2 Primer sequences of differentially expressed genes (DEGs) of RT-qPCR
No.	Gene ID (Arachis hypogaea)	primer sequences (5'-3')
1	Actin-F	GATTGGAATGGAAGCTGCTG
	Actin-R	CGGTCAGCAATACCAGGGAA
2	LOC112797634-F	ATTGCTGTGCCTCAATGGTC
	LOC112797634-R	AGTAGTGGTGGTTGGTTGGTT
3	LOC112733553-F	TCACCCACCCACTTTACCCT
	LOC112733553-R	AGTGCCGTTGGAGTTAGCAC
4	LOC112752001-F	AGAGTTGATGCTGATGAGAAAGGT
	LOC112752001-R	CCAATTTTGCCACAAACTCGGT
5	LOC112754776-F	TGCAGAGTGAAGTTGTTTCCC
	LOC112754776-R	TCTTCATCACCGGAACACCA
6	LOC112712326-F	TCATCTGGTTTTGTCCCTGAAT
	LOC112712326-R	GGAGGAACACAACTGGGGTAG
7	LOC112775566-F	GTTTCCAGCACAGGGACACA
	LOC112775566-R	TCTGATGTCCTTGCCAGCAT
8	LOC114925992-F	TCCCAAGTCAAGTCAATCCTTC
	LOC114925992-R	GTATGCAGTTCCTGGGGCAA
9	LOC112777442-F	ATTTCCGGGCCGTTTGAGAA
	LOC112777442-R	CTAAGGCCCAAGTGTCCCAG
