# Supplementary material for: Exogenous Calcium Alleviates Oxidative Stress Caused by Salt Stress in Peanut Seedling Roots by Regulating the Antioxidant Enzyme System and Flavonoid Biosynthesis
Source: Antioxidants (Basel). 2024 Feb 14;13(2):233. doi: 10.3390/antiox13020233 (PMC10886236; doi:10.3390/antiox13020233)
Supplement: Supplementary file 1 [file antioxidants-13-00233-s001.zip › Table S5.xlsx]

## Sheet: Sheet1
geneID	CK	Na	Ca	Na_Ca
LOC112733554	217.333	4376	145.667	329
LOC112791520	291.333	4796	155.667	469
LOC112734659	157	2970.33	33	141
LOC112737201	26.3333	323.667	20.6667	94.3333
LOC112748459	26.3333	846.667	55.3333	43.6667
LOC112789279	23.3333	872	31.3333	140.333
LOC112792439	63.3333	2332.33	21	66.3333
LOC112799808	45.3333	607.667	15.6667	37
LOC112800534	17	923.333	50.6667	25.6667
LOC112727996	175.333	672.667	438	119
LOC112750332	194.333	727	356.667	113.667
LOC112784046	9	105.333	7.66667	12.6667
LOC112695326	154.333	8	114	111
LOC112707909	402.333	32.6667	720.667	247
LOC112709830	32.6667	3331.67	15	45.3333
LOC112740702	0	333.667	0	0
LOC112740703	0.333333	202.667	0	0
LOC112740705	1.33333	378.667	1.33333	1.33333
LOC112744553	159	6.33333	200.333	151
LOC112744558	10	2849	4.66667	17
LOC112772937	179	4.33333	417.333	125
LOC112794489	1	217	0	0
LOC112794491	0	226	0	0
LOC112794493	0	307.667	0	3
LOC112797857	14.6667	5068.33	8.33333	85
LOC112733553	199.333	2783	93	240
LOC112791519	334.667	2368.67	105	378.333
LOC112707064	200	940.333	145	82
LOC112708398	12.6667	140.333	6	5.33333
LOC112716507	172.333	814.667	58	75.6667
LOC112744584	32	1870	50.6667	55.3333
LOC112744585	5	231.667	17	17.6667
LOC112744588	732	40.3333	1608.67	1048
LOC112786683	32	128.667	16	18.6667
LOC112795397	9	162.667	26.6667	18.6667
LOC112797053	73.6667	491.667	81	119.333
LOC112797877	66	219.667	108.667	72
LOC112797879	568.333	40.6667	606	560.333
LOC112797921	59	299	36	67.6667
LOC114924131	158	2902.33	226	282
LOC112696965	17.6667	301.333	41.3333	7.66667
LOC112715071	203.667	8	163.667	153.333
LOC112734809	361	0	400.333	377
LOC112734810	350	28	220.667	206.667
LOC112754846	32.6667	567.333	49	17.6667
LOC112792557	1505.33	29.3333	2468	2115.33
LOC112804060	196	7.33333	169.667	136.333
LOC112706014	0	559.667	48.3333	3
LOC112720208	7993.33	37812	2384.67	3748.33
LOC112740947	3702.67	25839	1255	3031
LOC112740948	460.667	1337	168.333	285.333
LOC112741580	1477.67	3765.33	411	695.333
LOC112741587	93	3172	93.6667	235.333
LOC112741591	213.333	730	14.3333	75.6667
LOC112741592	157	1105.33	9.66667	44.3333
LOC112741594	1900.33	6851.33	594	794.667
LOC112755723	2661.67	9871.33	904.333	1390
LOC112763869	0	135.333	3.33333	1
LOC112789292	20	508.667	11	9.66667
LOC112790504	4398	28433	1369	2944
LOC112794644	79.3333	1963	56.3333	228
LOC112795670	6014.67	39473.3	2631.33	3980.67
LOC112796266	2537.67	7979.67	1113.33	1691.67
LOC112801347	10.6667	136.667	4	13.6667
LOC112751885	186.333	787.667	161.667	90.3333
LOC112802939	115.667	397	126.333	69.6667
LOC112715348	651	3.33333	434	524
LOC112715350	271.333	13.6667	730	320
LOC112743516	125.667	17.6667	65.6667	151.667
LOC112796903	171	9.33333	92.6667	127
LOC114924022	56	798	19.3333	48
LOC114925992	84	778	21.3333	43.3333
LOC112712326	430.667	1729	170	331
LOC112715796	451	1627.33	271.667	345
LOC112741795	1336.67	3932.33	626	609.667
LOC112777442	263	2080.67	174.333	237
LOC112784300	678.333	1944	339	480.667
LOC112796480	1255.67	3422	523	543.667
LOC112752001	529	127.667	511.667	590.667
LOC112754776	1140.33	161.333	815	1077
LOC112775566	3242.33	952	3472.67	2397
LOC112764410	675	3655.33	529.667	302.667
LOC112715453	121.667	866.667	47.3333	110
LOC112697369	1609.33	1821	1088.33	962.667
LOC112797634	1524.67	2422	577.667	1034.67
LOC112750681	401.667	1421.33	641.333	547.667
LOC112802569	264.333	1045.33	559.667	353.667
LOC112799785	176	916	284	206.333
LOC112711956	272.667	1470.67	316.333	99
LOC112721136	178	1633.67	306.333	211.333
LOC112720541	140.667	940.333	209.333	125
LOC112754776	1140.33	161.333	815	1077
LOC112702584	153.333	24882.7	130.333	83.6667
LOC112765469	265.667	23507	200.667	179
